# Supplementary material
Source: publisher figshare collection journal article supplement (https://gsapubs.figshare.com/ndownloader/files/22758776)
Supplement: Supplementary file 1 [file 22758776]

## DATA REPOSITORY ITEM DR2009101

Supplemental Online Material

# Reconstructing Earth's surface oxidation across the Archean-Proterozoic transition

### Stratigraphy

The ~2,650 to ~2,100 Myr Transvaal Supergroup rests unconformably on the volcano-sedimentary Ventersdorp Supergroup (Fig. DR1 and DR2). It formed during slow regional cooling and subsidence of the Kaapvaal Craton (Sumner and Beukes, 2006). Two structural sub basins can be recognized: the Griqualand-West basin, and the Transvaal basin (Fig. 1).

During the first depositional interval, trough-like basins in the Transvaal basin were filled with alluvial and fluvial siliciclastic rocks (Button, 1973a; Eriksson et al., 2005; Sumner and Beukes, 2006). These continental deposits are equivalent to a marine carbonate-siliciclastic ramp in the Griqualand-West basin (Beukes, 1979, 1987; Sumner and Beukes, 2006). A major disconformity at the top of the interval represents short, but craton-wide exposure of the Ventersdorp basement and lowstand clastic deposition (Fig. DR1; Beukes, 1987; Sumner and Beukes, 2006). Ages of the first depositional interval are relatively well constrained between ~2,650 and ~2,590 Myr. Lavas in the basal Schmitsdrif Subgroup were dated at  $2,642 \pm 3$  Myr (Walraven and Martini, 1995); carbonates in the overlying Oaktree Formation gave an age of  $2,583 \pm 5$  Myr (Martin et al., 1998) and provide a minimum age for the upper disconformity (Fig. DR1).

As the craton was flooded again, the extensive Malmani-Campbellrand rimmed carbonate platform was established (Fig. DR1; Beukes, 1987; Sumner and Beukes, 2006). Subsidence was higher than in interval 1, but carbonates were able to fill the accommodation space, and thicknesses are uniform over the platform (Sumner and

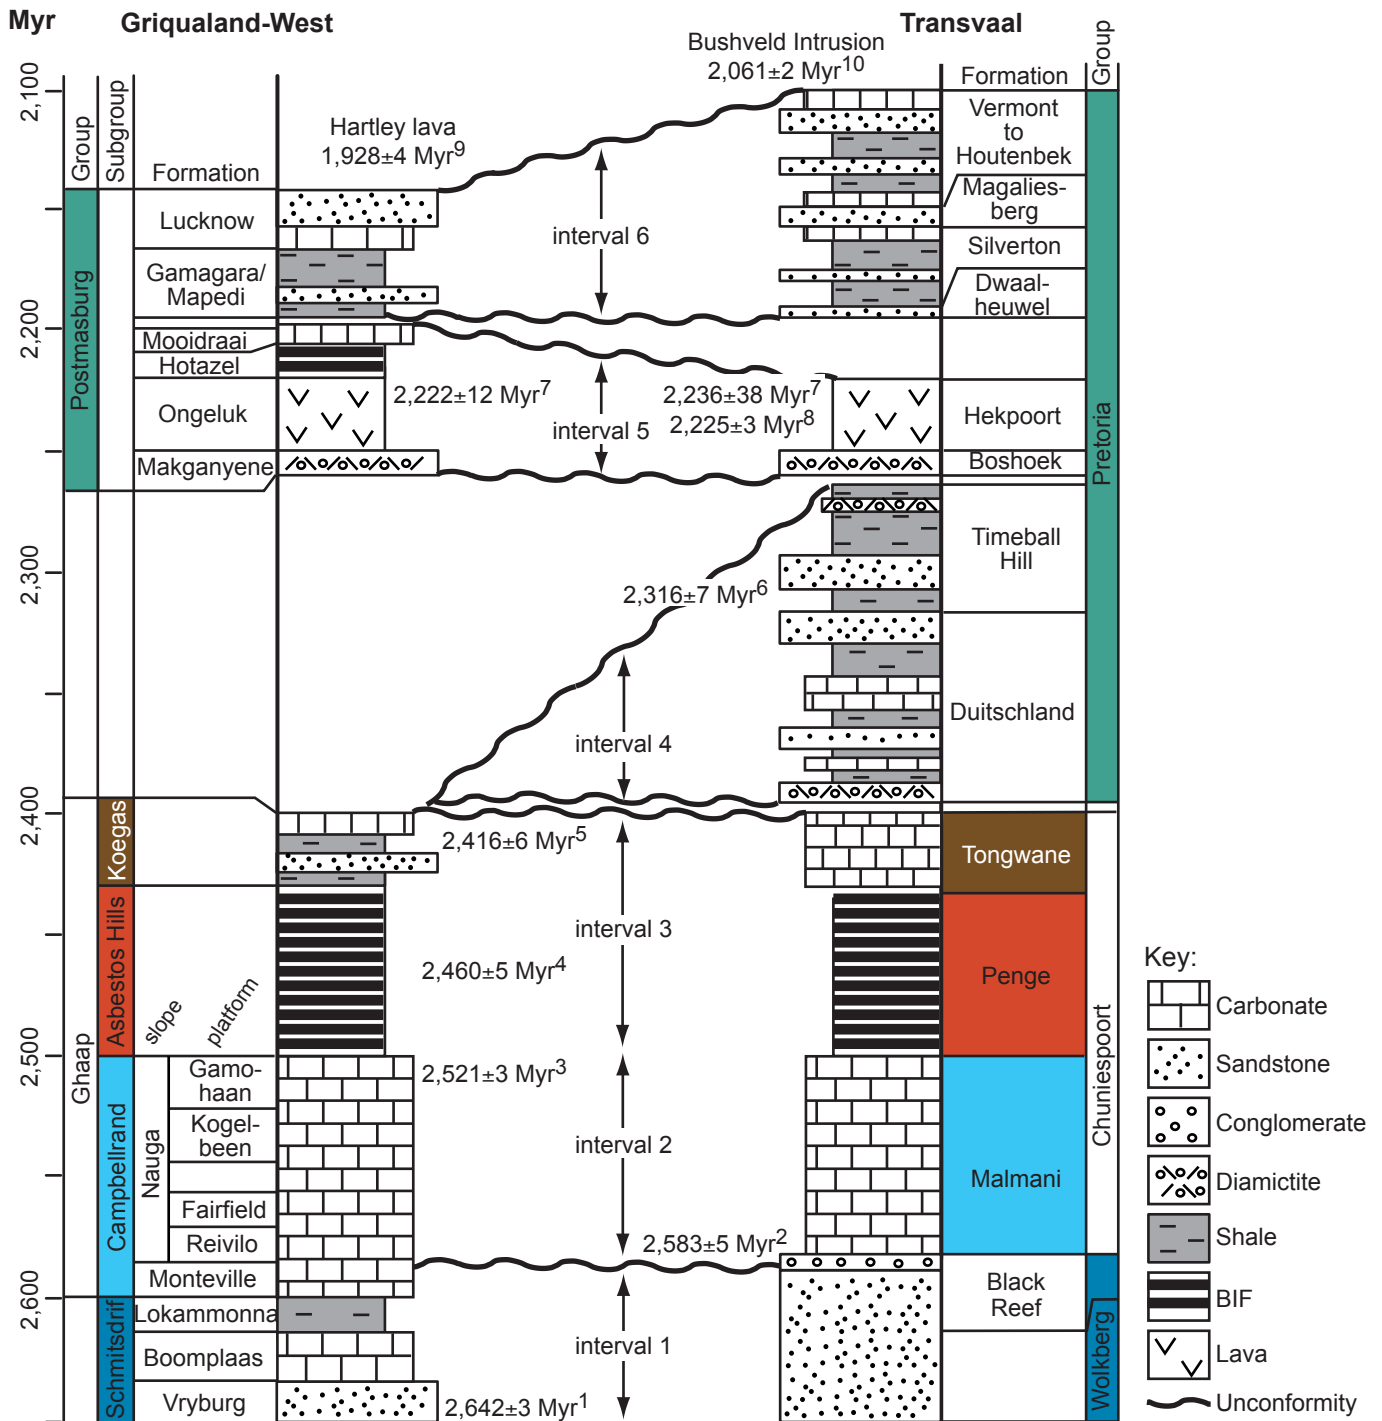

Figure DR1:Chronostratigraphy of the Transvaal Supergroup (based on Beukes et al., 2002; Dorland, 2004). The age dates are from: 1, (Walraven and Martini, 1995); 2, (Martin et al., 1998); 3, (Sumner and Bowring, 1996); 4, (Pickard, 2003); 5, (Gutzmer and Beukes, 1998); 6, (Hannah et al., 2004); 7, (Cornell et al., 1996); 8, (Dorland, 2004); 9, (Cornell et al., 1998); 10, (Walraven, 1997).

Section VEN  
 Lucknow Fm.  
 Farm Venn  
 S 28°04'21.9"  
 E 022°48'34.5"

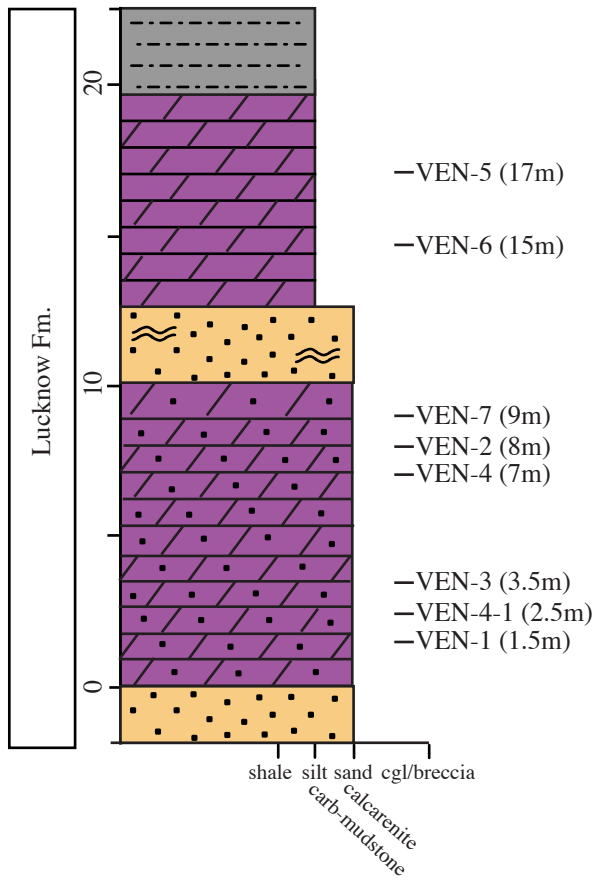

Section MOG  
 Silverton Fm.  
 Mogomane Hill  
 S 25°12'35.4"  
 E 025°46'32.9"

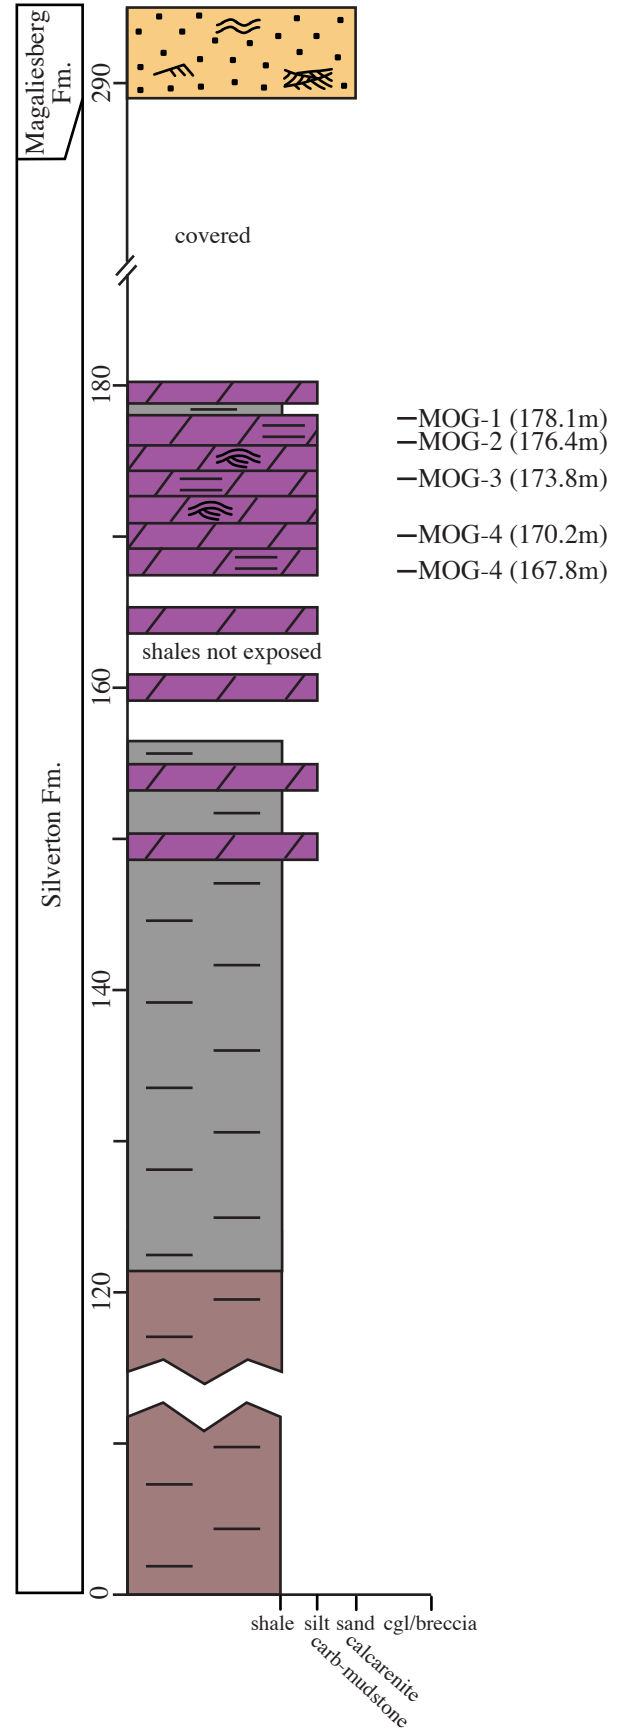

Core M10  
Hotazel-Mooidraai Fm.  
Farm Middelpaats (Anglo-American)

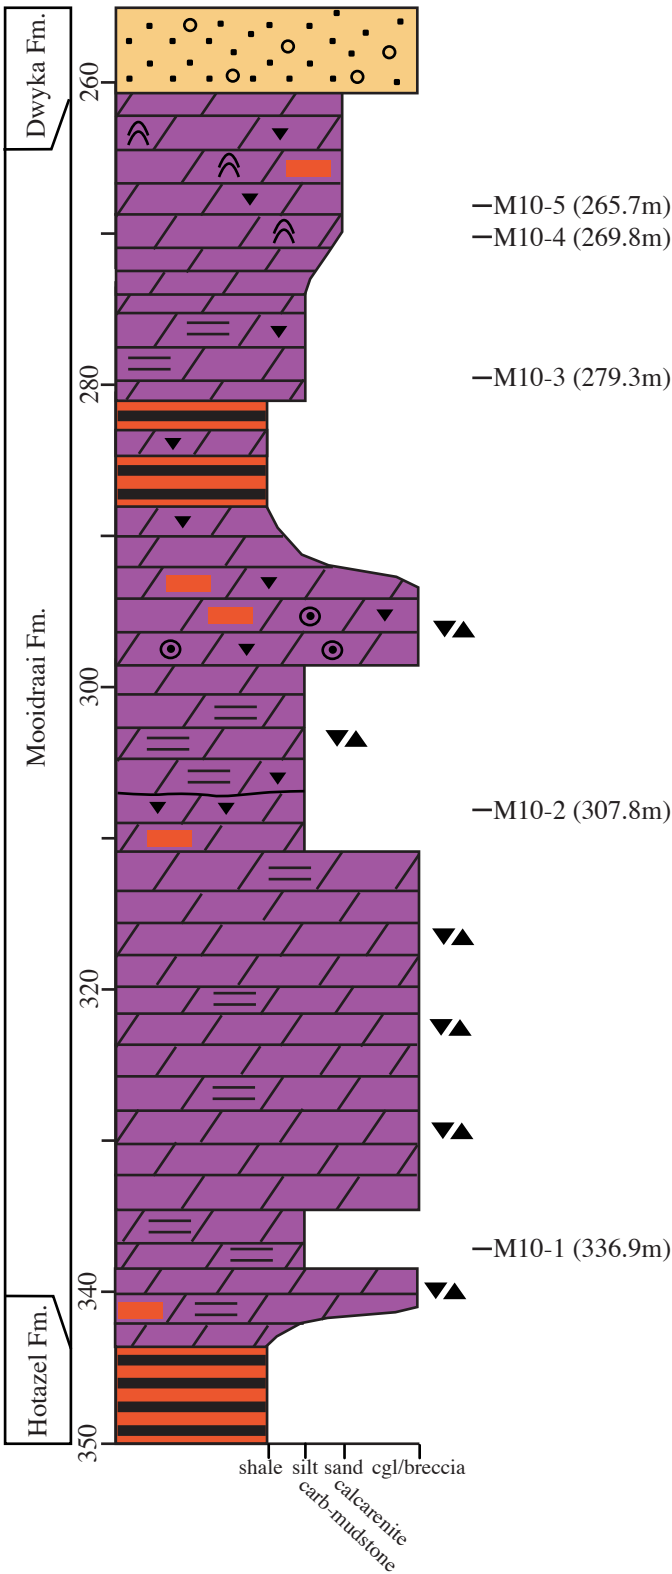

Section TON  
Tongwane Fm.  
Tongwane Gorge  
S 24°10'43.6"  
E 029°55'51.9"

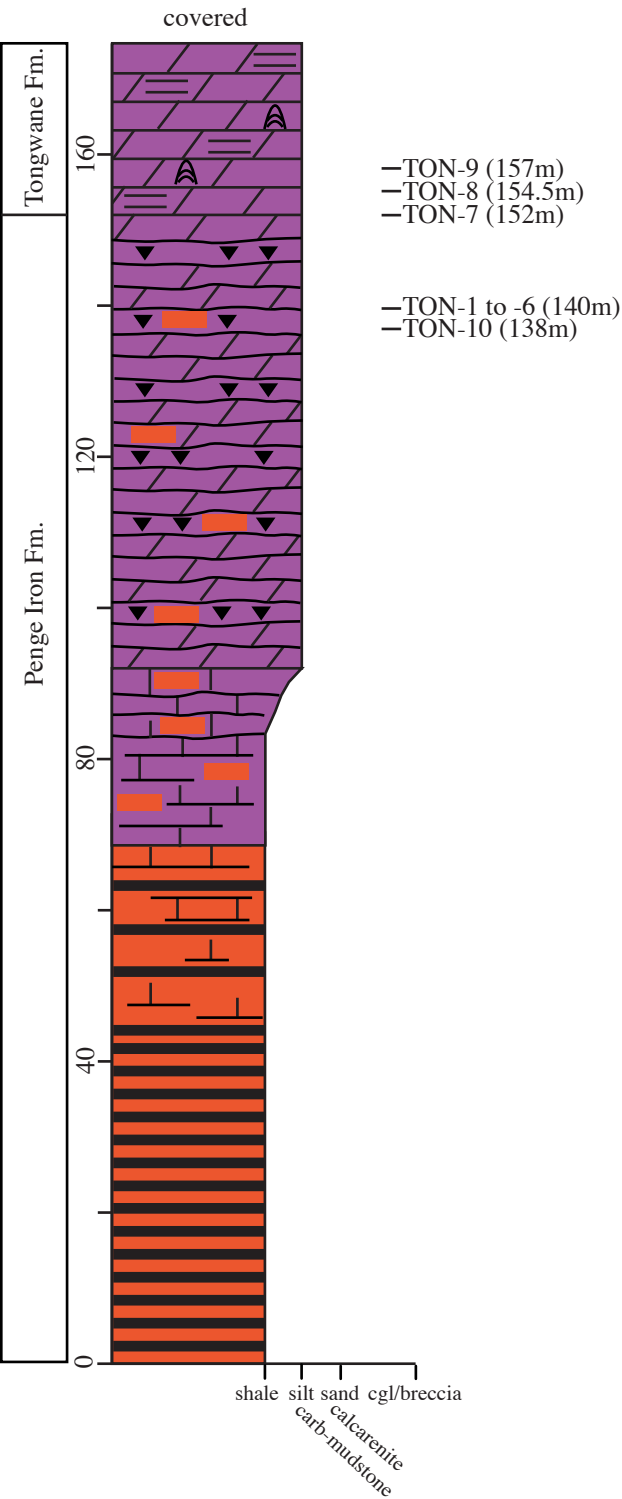

Section DUI  
Deutschland Fm.  
Farm Deutschland  
S 24°17'44.0"  
E 029°08'10.1"

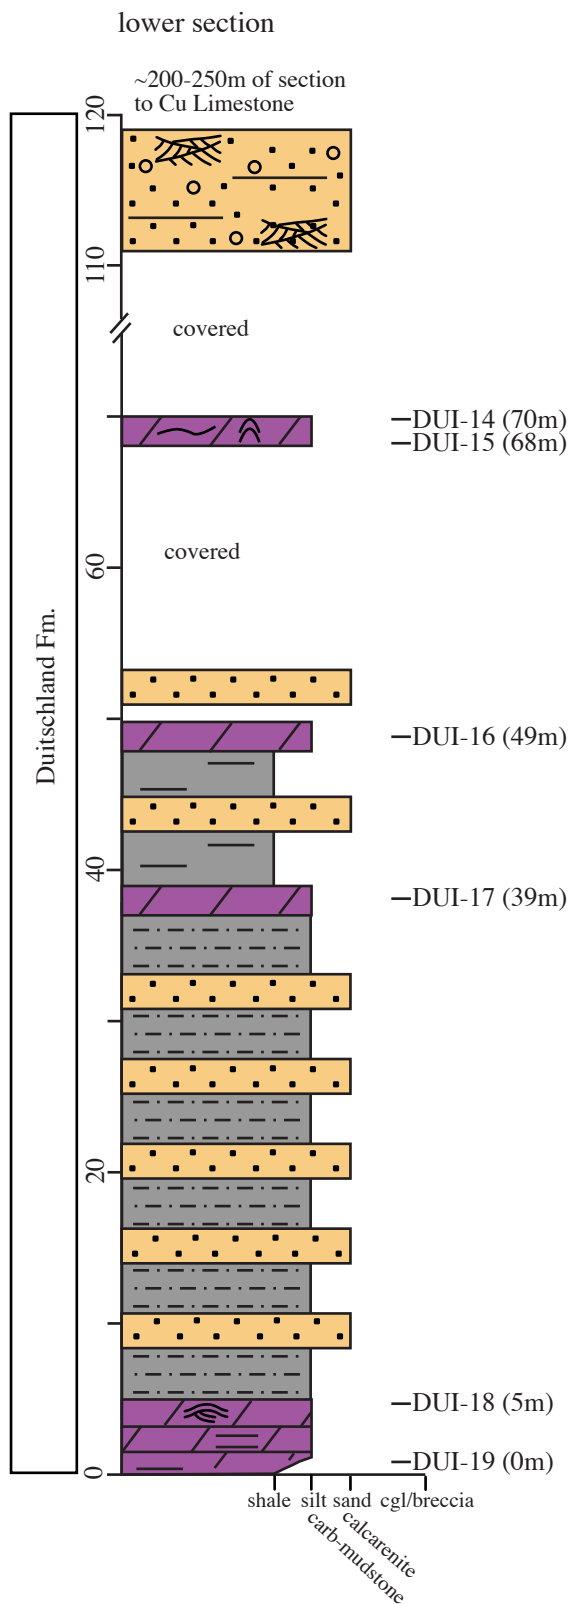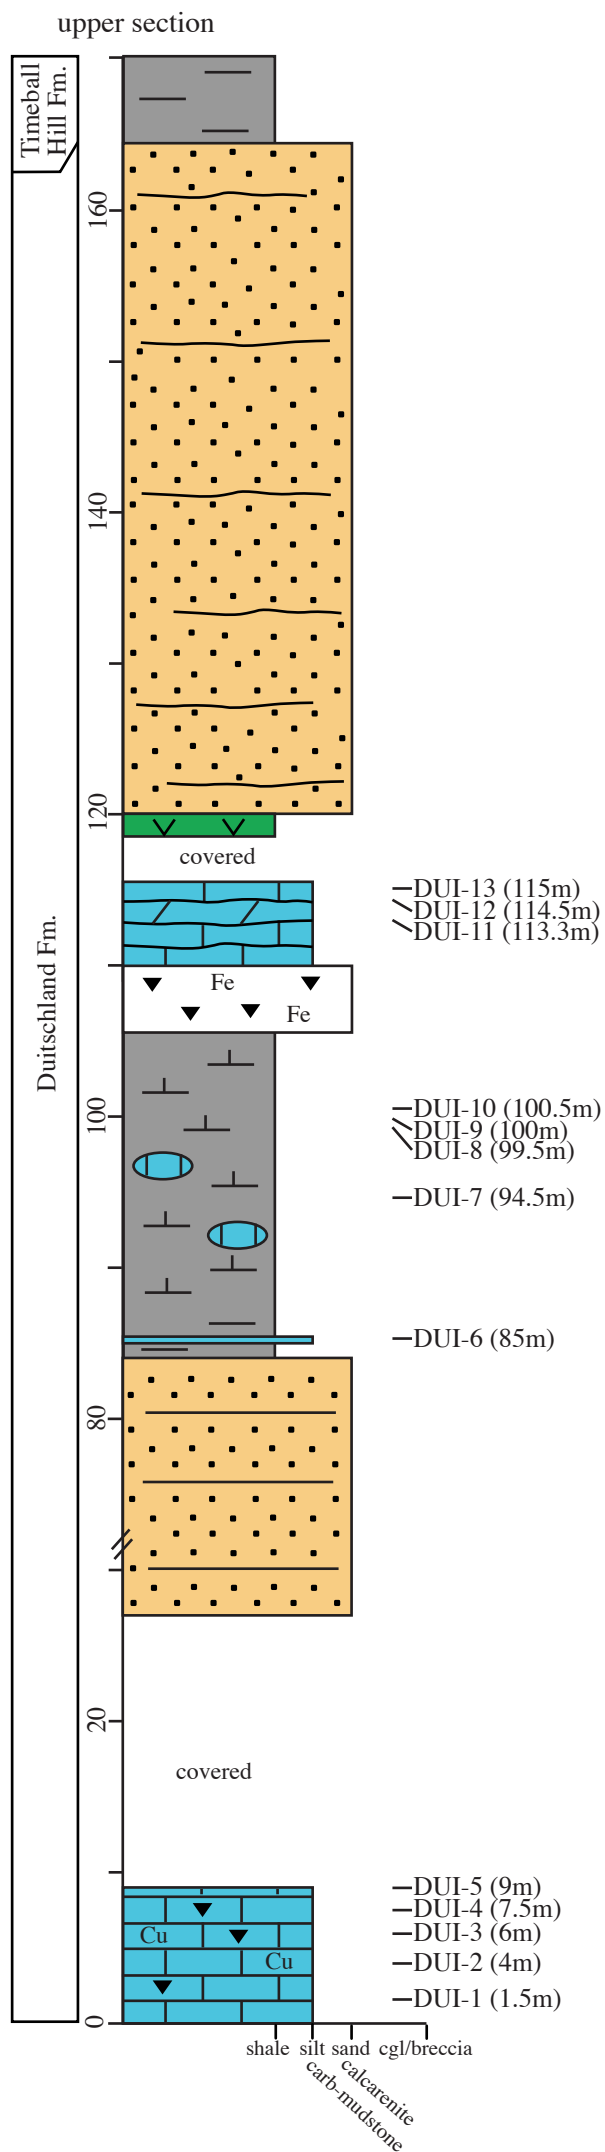

Section KOE  
Koegas Subgp.  
Farm Naragas  
S 29°22'52.3"  
E 022°34'58.1"

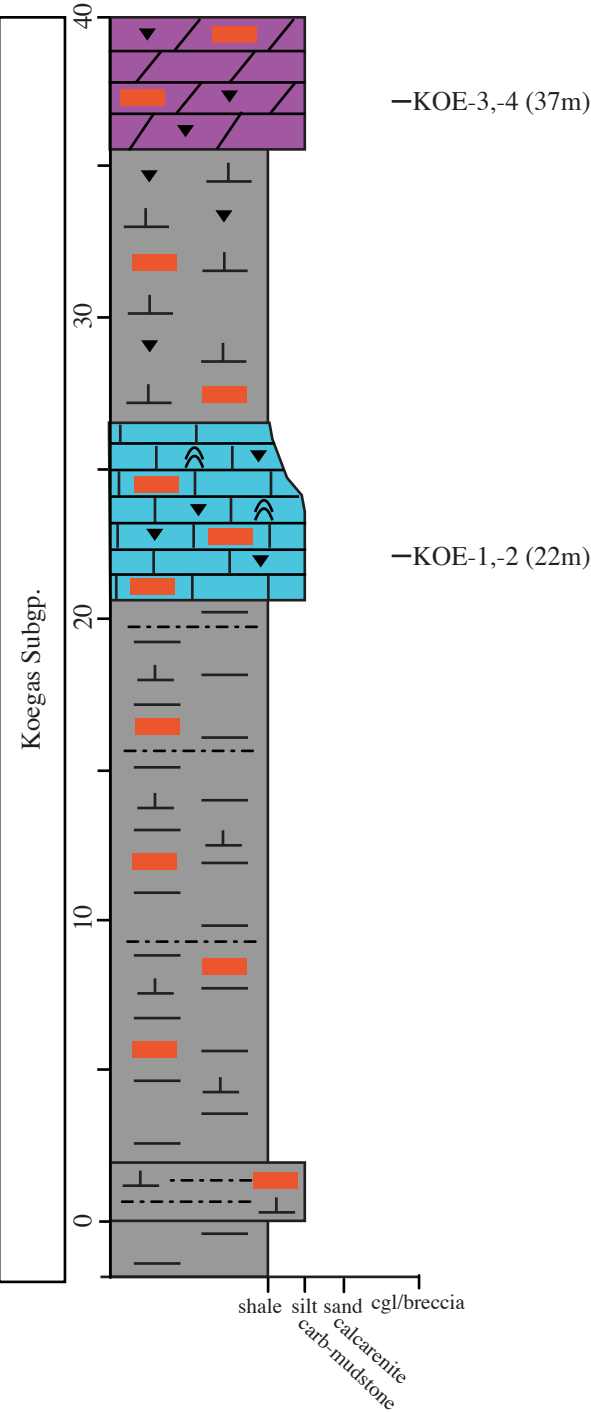

Section SAN  
Koegas Subgp.  
Farm Sandridge  
S 28°49'21.7"  
E 022°38'44.3"

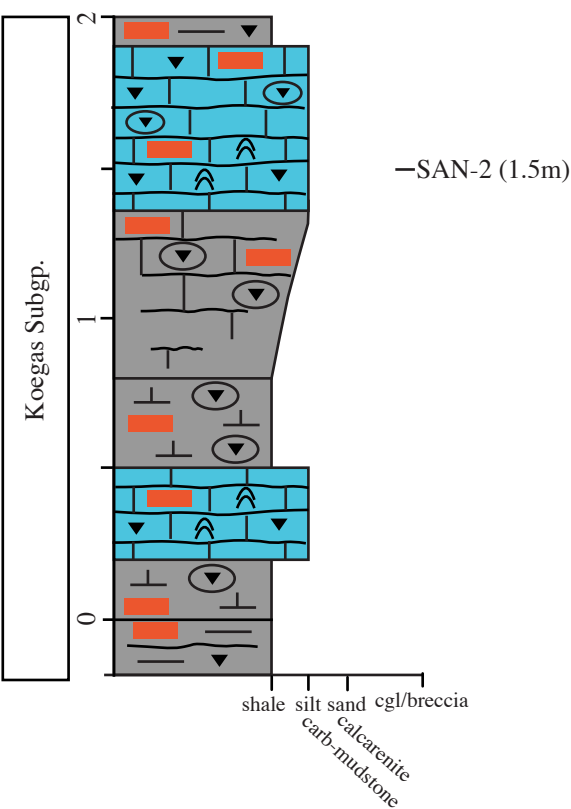

Section NAU (section 1)  
Nauga Fm.  
Farm Nauga  
S 29°27'04.3"  
E 022°20'50.9"

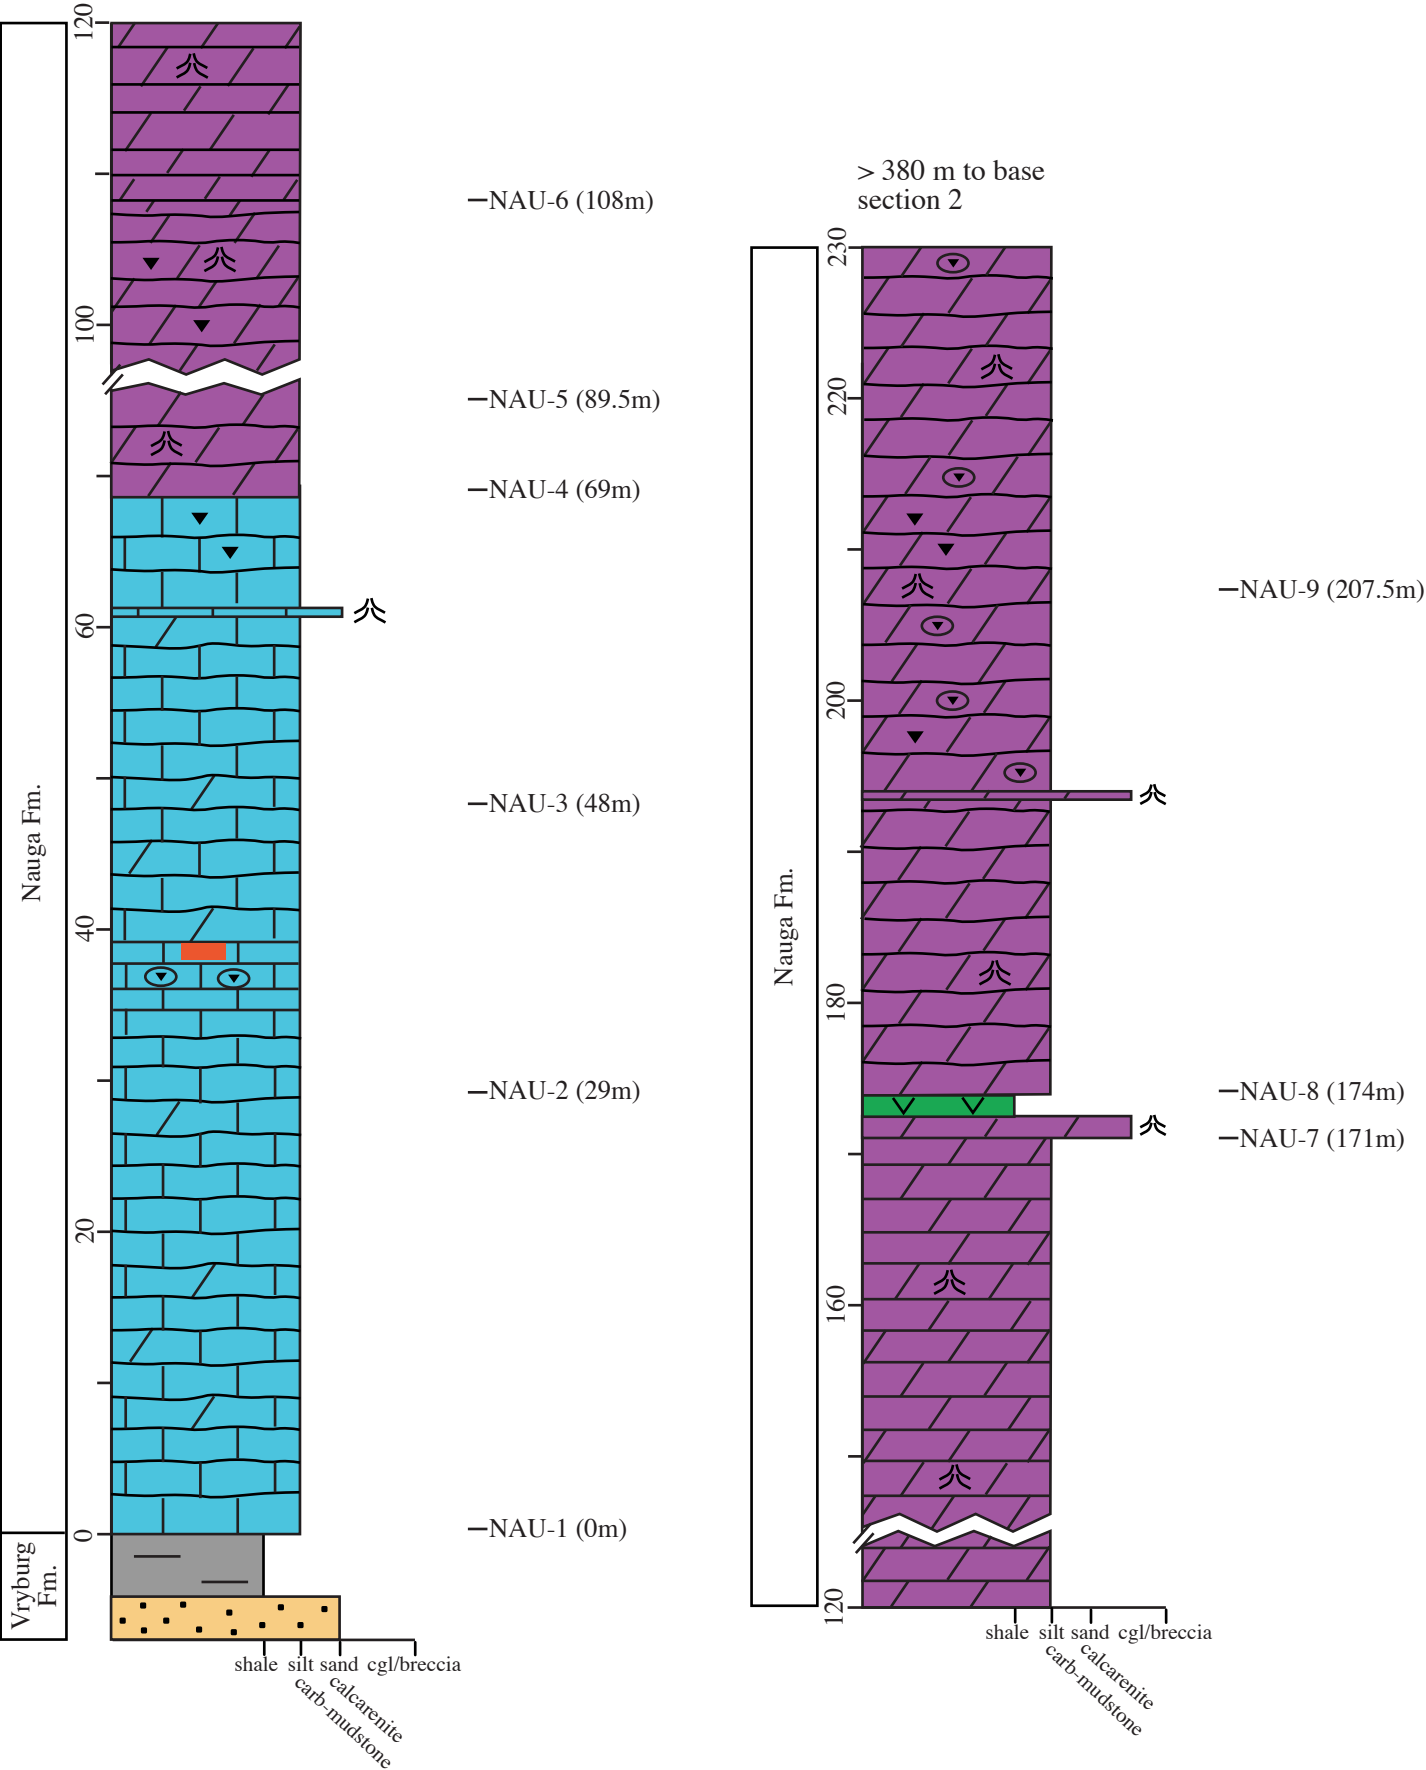

Section NAU (sections 2 and 3)  
Nauga Fm.  
Farm Nauga  
S 29°27'04.3"  
E 022°20'50.9"

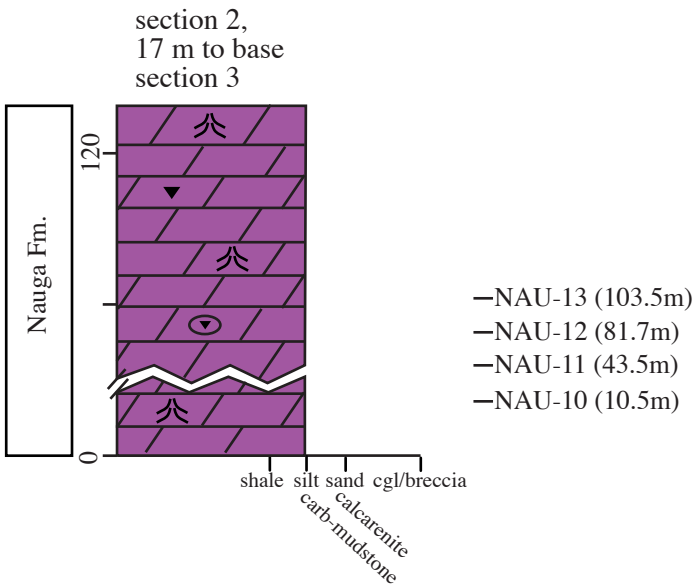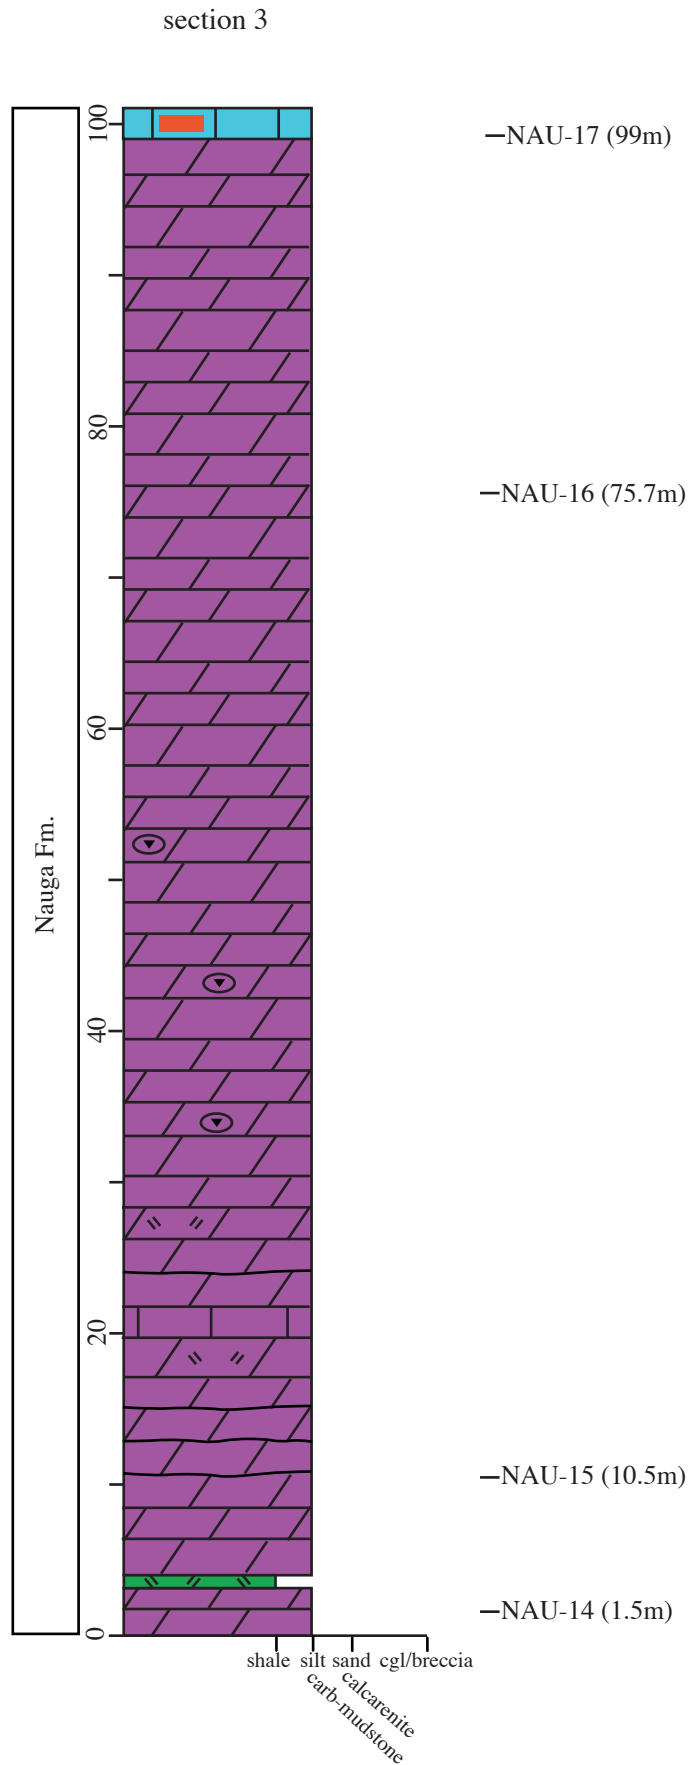



Section GLA  
Gamohaam Fm.  
Farm Gladstone  
S 28°06'05.7"  
E 023°34'45.3"

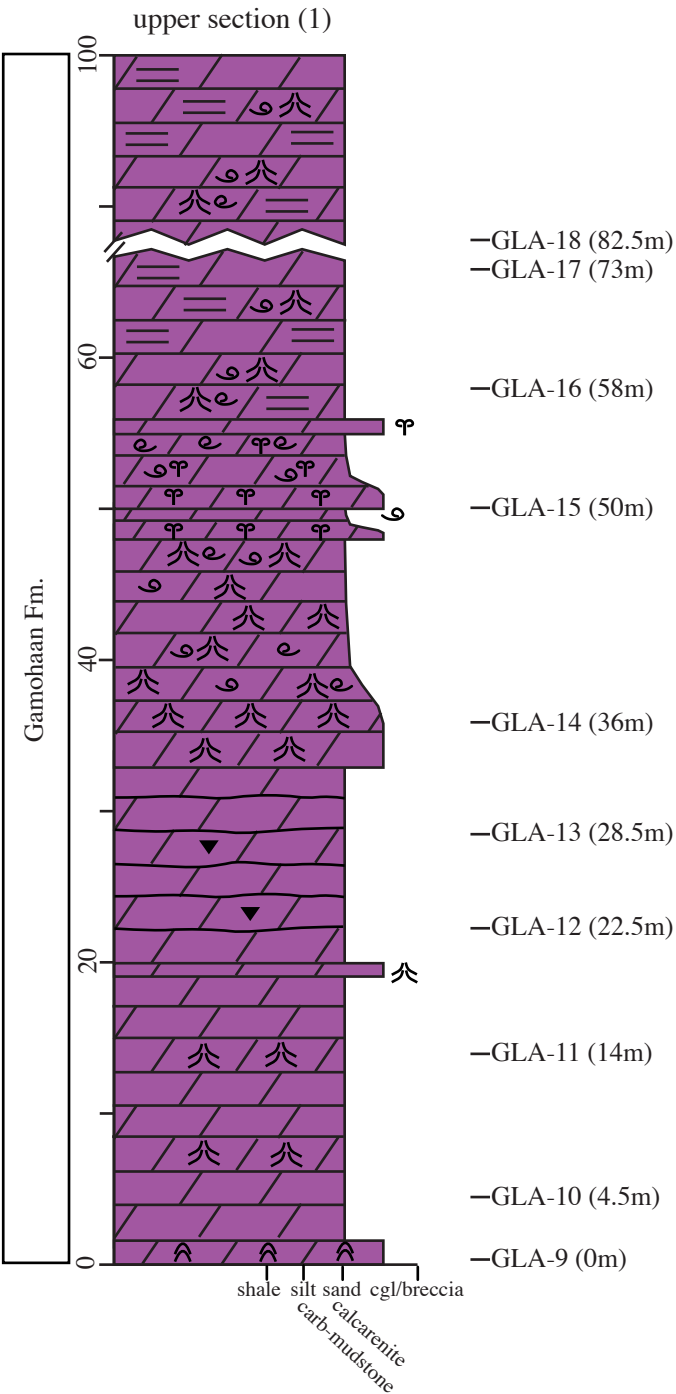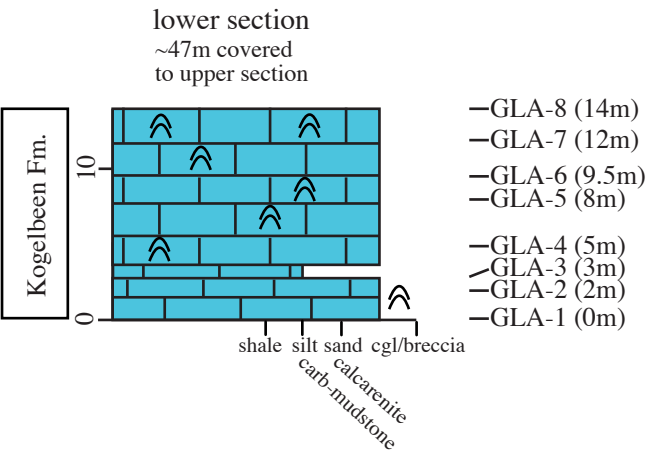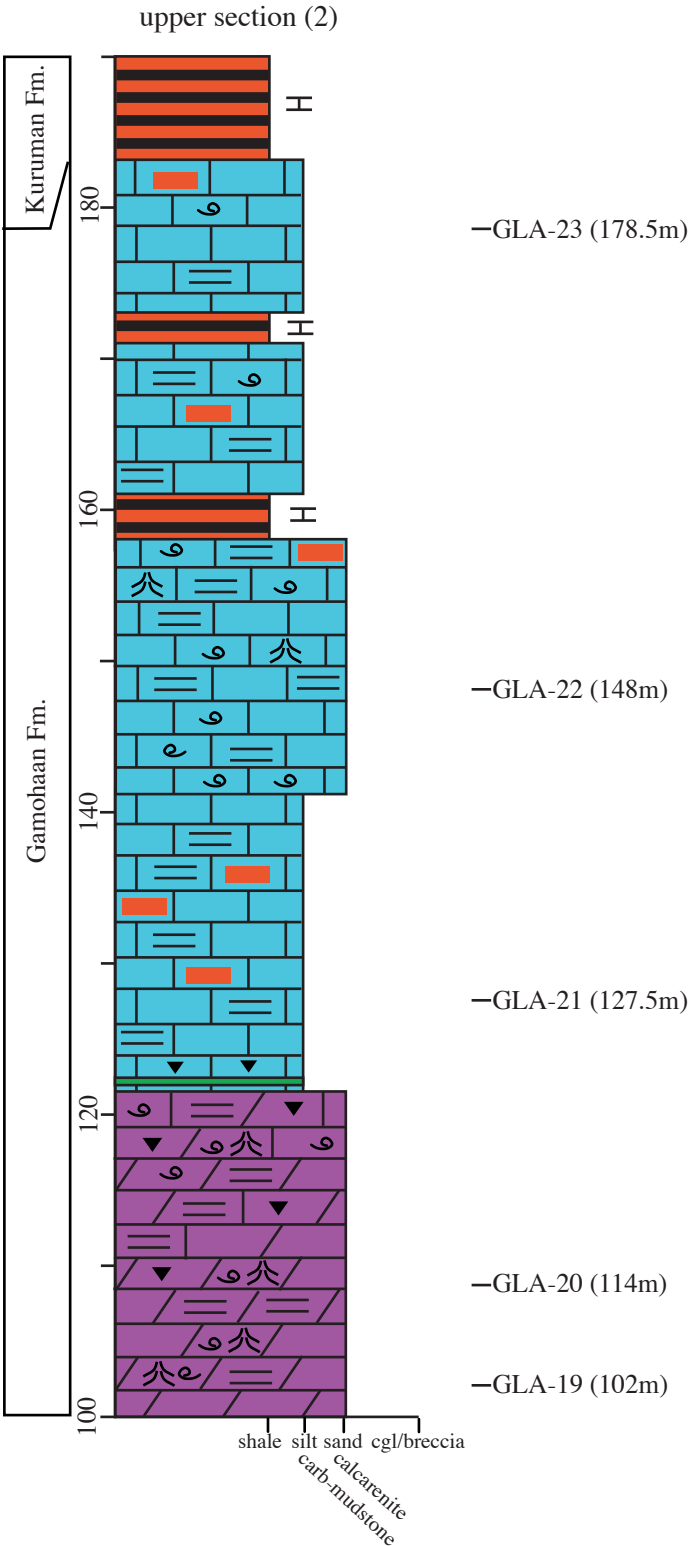

Section MON  
Monteville Fm.  
Farm Monteville  
S 28°35'50.7"  
E 023°58'01.2"

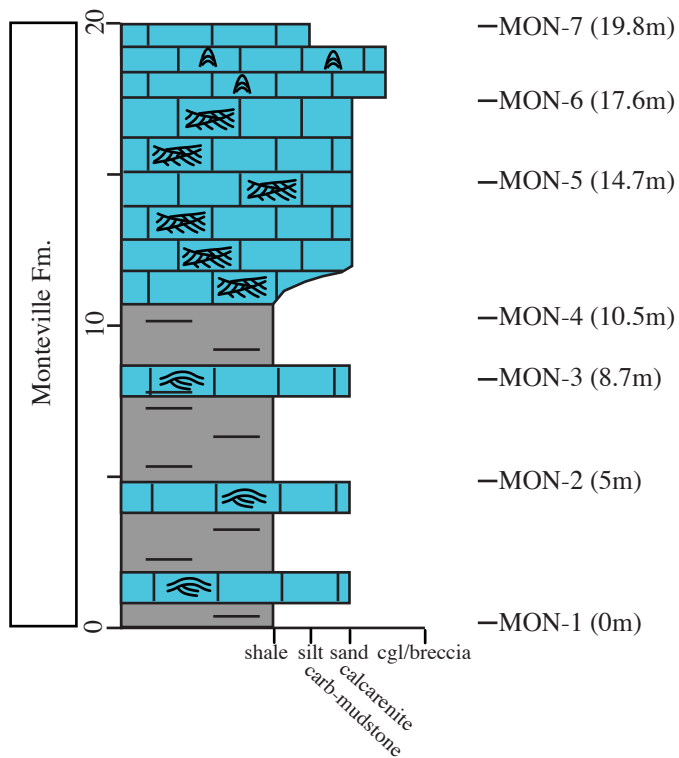

Section BAV  
Reivilo Fm.  
Farm Baviaanskrantz  
S 28°35'16.9"  
E 023°57'37.9'

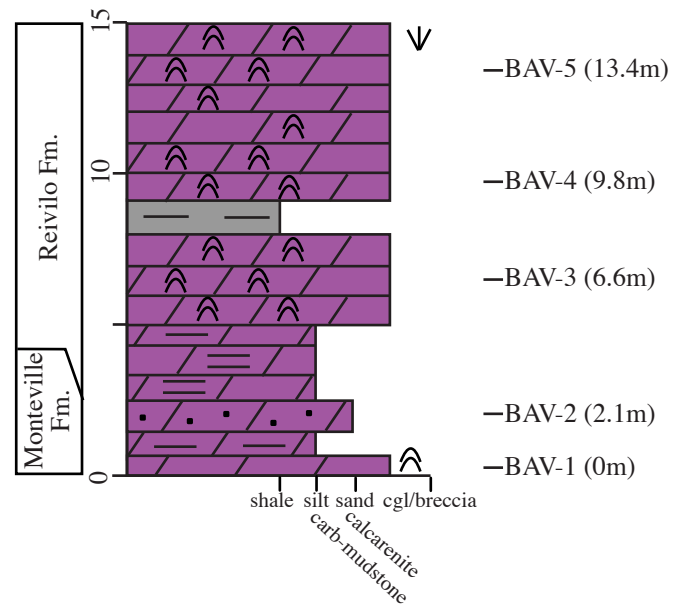

Section BOO  
Boomplass Fm.  
Ulco-Schmitsdrif road  
S 28°39'35.1"  
E 024°01'44.1"

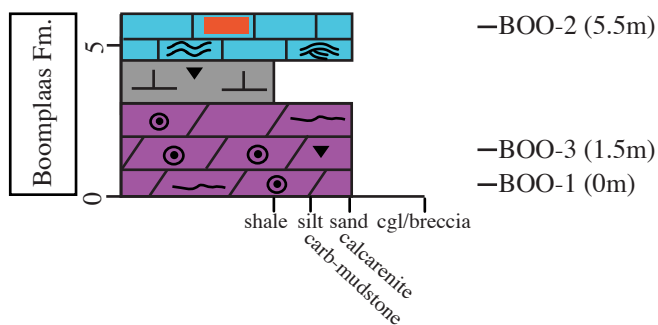

## Lithology:

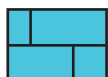

limestone

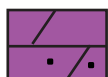

dolostone/sandy  
dolostone

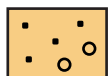

sandstone, conglomerate,  
diamictite

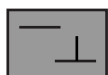

shale/marl

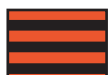

banded iron  
formation

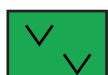

igneous sill

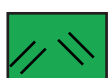

tuff

... silt

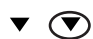

chert/chert nodule

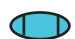

carbonate nodule

Cu copper enrichment

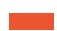

iron enrichment

## Sedimentary structures:

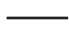

flat bedded

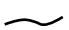

wavy bedding

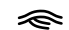

HCS bedding

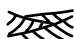

trough cross-bedding

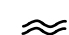

wave cross bedding

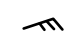

ripple cross bedding

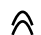

domal/columnar  
stromatolites

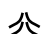

cusped microbialites

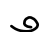

contorted microbialites

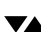

brecciation

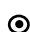

ooids

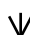

aragonite fans

Figure DR2: The measured sections (in color) that show the position of the samples

Beukes, 2006). Shallow subtidal carbonates dominate over most of the platform (Fig. DR2); they pass to slope and basinal carbonates near the southwestern edge of the craton (Beukes, 1987; Sumner and Grotzinger, 2004). A major transgression caused drowning of the platform (Beukes, 1987; Beukes et al., 1990). The end of carbonate deposition is constrained by an age of  $2,521 \pm 3$  Myr (Fig. DR1; Sumner and Bowring, 1996).

As a result of transgression, carbonates are overlain by deeper-marine shales and ultimately by open shelf banded iron formations (interval 3 in Fig. DR1). During subsequent regression, granular iron formations were deposited in epeiric sea, lagoonal and supratidal environments (Beukes, 1983, 1984). The transgressive-regressive sequence terminates with shelf and deltaic clastics, minor carbonates and iron formations of the Koegas Subgroup in the Griqualand-West basin (Fig. DR1; Beukes, 1983, 1984). In the Transvaal basin, iron formations pass conformably to Tongwane Formation shallow-water carbonates, which are likely equivalent to Koegas deposits (Swart, 1999). Iron formations are poorly dated, and the beginning of iron deposition has been estimated at  $\sim 2,500$  Myr. The only available age constraint for the top of interval 3 comes from the Koegas Subgroup ( $2,516 \pm 6$  Myr; Gutzmer and Beukes, 1998). A basin wide unconformity developed after  $\sim 2,400$  Myr (Fig. DR1).

Rocks with an age of  $\sim 2,400$  to  $\sim 2,250$  Myr are only known from the Transvaal basin (Fig. DR1), where an intracratonic basin formed during interval 4. Chronostratigraphic constraints are given by an age date of  $2,316 \pm 6$  Myr (Hannah et al., 2004), and by correlation with global glaciogenic epochs (Bekker et al., 2001). Interval 4 includes diamictites, shallow-marine carbonates, and deltaic to shelf siliciclastics (Coetzee et al., 2006).

Another craton-wide unconformity developed after  $\sim 2,250$  Gyr (Fig. DR1). Basal units of the overlying interval 5 can be correlated across the craton: the Makganyene-Boshhoek diamictite (Polteau et al., 2006), gradually passing up section to sedimentary-volcanic rocks, dated between  $2,222 \pm 12$  Myr and  $2,238 \pm 36$  Myr (Cornell et al., 1996). A lateritic paleosol profile developed craton-wide at the top of the volcanics (Beukes et al., 2002). In Griqualand-West, the volcanics are conformably overlain by banded iron and manganese formations of the Hotazel Formation

(Cairncross et al., 1997; Schneiderhan et al., 2006). The Hotazel Formation in turn passes up section to the shallow-marine carbonates of the Mooidraai Formation (Bau et al., 1999). These chemical sediments are not represented in the Transvaal basin (Fig. DR1 and DR2).

The last phase of Transvaal deposition (interval 6) started ~2,200 Myr with continental red beds (Fig. DR1; Beukes and Smit, 1987). Red beds pass up section to intracratonic shallow-marine carbonates and siliciclastics (Button and Vos, 1977; Eriksson et al., 2002; Swart, 1999). Carbonates have highly positive  $\delta^{13}\text{C}$  values, indicating deposition during the 2,220-2,060 Myr Lomagundi carbon isotope excursion (Karhu and Holland, 1996; Swart, 1999). The Transvaal Supergroup is capped by a major angular unconformity, and overlain by volcanics in Griqualand West (1,928±4 Myr; Cornell et al., 1998; van Niekerk, 2006), and by the Bushveld intrusion in the Transvaal basin (2,061±2 Myr; Walraven, 1997) (Fig. DR1).

| <b>Stratigraphic unit,<br/>location</b>                                                                                             | <b>Age</b> | <b>Facies description</b>                                                                                                                                                                                             | <b>Depositional<br/>environment</b>   | <b>Reference</b>                                                       |
|-------------------------------------------------------------------------------------------------------------------------------------|------------|-----------------------------------------------------------------------------------------------------------------------------------------------------------------------------------------------------------------------|---------------------------------------|------------------------------------------------------------------------|
| Houtenbek<br>Formation<br>Rietvalley Farm<br>for section: fig. 10 in<br>Button and Vos<br>(1977)<br>S 25°42'15.4"<br>E 029°57'41.4" | ~2,070 Myr | Sandstone, limestone;<br>sandstone with tabular<br>cross bedding, flat<br>bedding, current<br>ripples, limestone with<br>common domal and<br>stratiform<br>stromatolites with<br>intraclastic breccias,<br>mud cracks | Shallow<br>subtidal and<br>intertidal | Button and<br>Vos<br>(1977);<br>Schreiber<br>and<br>Eriksson<br>(1992) |

|                     |            |                         |                 |            |
|---------------------|------------|-------------------------|-----------------|------------|
| Silverton Formation | ~2,150 Myr | Shales passing up       | Open, storm-    | Button     |
| Mogomane Hill       |            | section to micritic     | influenced      | (1973b;    |
| S 25°12'35.4"       |            | dolostones with         | shelf           | Eriksson   |
| E 025°46'32.9"      |            | hummocky-cross          |                 | et al.     |
|                     |            | stratification (HCS)    |                 | (2002)     |
| Lucknow Formation   | ~2,150 Myr | Sandstones,             | Marginal        | Schröder   |
| Venn Farm           |            | siltstones, sandy       | marine, fluvio- | et al.     |
| S 28°04'21.9"       |            | dolostones;             | deltaic         | (2008),    |
| E 022°48'34.5"      |            | sandstones massive,     | sandstones,     | Swart      |
|                     |            | cross bedded, with      | carbonate       | (1999)     |
|                     |            | wave ripples,           | lagoons and     |            |
|                     |            | dolostones massive      | sand/mud flats  |            |
|                     |            | (locally stromatolitic) |                 |            |
| Mooidraai           | ~2,200 Myr | Banded iron             | Deep subtidal   | Bau et al. |
| Formation           |            | formations passing up   | (basinal),      | (1999)     |
|                     |            | section to Fe-bearing   | carbonates on   |            |
|                     |            | dolostones with chert;  | shallow         |            |
|                     |            | dolostones laminated,   | subtidal        |            |
|                     |            | commonly brecciated,    | platform        |            |
|                     |            | grainstone textures, at |                 |            |
|                     |            | top stromatolitic       |                 |            |
| Duitschland         | ~2,320 Myr | Interbedded shales,     | Open shelf,     | Swart      |
| Formation           |            | sandstones,             | storm- and      | (1999);    |
| Duitschland Farm    |            | dolostones,             | wave-           | Bekker et  |
| S 24°17'44.0"       |            | limestones; basal       | influenced      | al. (2001) |

|                       |            |                                                                                                                                                                                                                        |                             |                 |
|-----------------------|------------|------------------------------------------------------------------------------------------------------------------------------------------------------------------------------------------------------------------------|-----------------------------|-----------------|
| E 029°08'10.1"        |            | diamictite not included<br><br>in section (~650 m<br>below Cu limestone<br>marker); carbonates<br>with HCS and<br>stromatolites,<br>prominent Cu<br>limestone marker,<br>sandstones flat<br>bedded and cross<br>bedded |                             |                 |
| Koegas Subgroup       | ~2,430 Myr | Ferruginous mudstone                                                                                                                                                                                                   | Open shelf                  | Beukes          |
| Naragas Farm          |            | (Fe lutite), cherty, with                                                                                                                                                                                              | around storm                | (1978,          |
| S 29°22'52.3"         |            | siltstone                                                                                                                                                                                                              | wave base,                  | 1983)           |
| E 022°34'58.1"        |            | intercalations, meter-                                                                                                                                                                                                 | lagoons                     |                 |
| Sandridge Farm        |            | thick interbeds of                                                                                                                                                                                                     |                             |                 |
| S 28°49'21.7"         |            | ferruginous cherty                                                                                                                                                                                                     |                             |                 |
| E 022°38'44.3"        |            | limestone and<br>dolostone; Fe lutite<br>laminated,<br>stromatolitic<br>carbonates, some<br>HCS                                                                                                                        |                             |                 |
| Tongwane<br>Formation | ~2,430 Myr | Banded iron<br>formations passing up                                                                                                                                                                                   | Deep subtidal<br>(basinal), | Swart<br>(1999) |

|                 |           |                         |                |            |
|-----------------|-----------|-------------------------|----------------|------------|
| Tongwane Gorge  |           | section to Fe-bearing   | carbonates on  |            |
| S 24°10'43.6"   |           | dolostones with chert;  | shallower      |            |
| E 029°55'51.9"  |           | dolostones massive      | platform?      |            |
|                 |           | and laminated,          |                |            |
|                 |           | stromatolitic           |                |            |
| Nauga Formation | ~2,600-   | Limestone and           | Slope of       | Beukes     |
| Farm Nauga      | 2,510 Myr | dolostone, chert        | carbonate      | (1987);    |
| S 29°27'04.3"   |           | intercalations;         | platform,      | Sumner     |
| E 022°20'50.9"  |           | massive, laminated      | below storm    | and        |
|                 |           | fine-grained            | wave base      | Grotzinger |
|                 |           | carbonates, ribbon      |                | (2004)     |
|                 |           | rock, intercalations of |                |            |
|                 |           | fenestrate              |                |            |
|                 |           | microbialites and       |                |            |
|                 |           | contorted laminated     |                |            |
|                 |           | mats                    |                |            |
| Kogelbeen-      | ~2,520-   | Kogelbeen: limestone;   | Kogelbeen:     | Beukes     |
| Gamohaam        | 2,500 Myr | domal stromatolites     | shallow        | (1987);    |
| formations      |           | Gamohaam: limestone     | subtidal,      | Sumner     |
| Farm Gladstone  |           | and dolostone,          | lagoonal;      | (2002);    |
| S 28°06'05.7"   |           | passing to iron         | Gamohaam:      | Sumner     |
| E 023°34'45.3"  |           | formation; grainstones  | deep subtidal  | and        |
|                 |           | and fenestrate          | to upper slope | Grotzinger |
|                 |           | microbialites, passing  |                | (2004)     |
|                 |           | up section to           |                |            |



---

|                   |            |                           |                  |            |
|-------------------|------------|---------------------------|------------------|------------|
|                   |            | contorted laminated       |                  |            |
|                   |            | mats and shale            |                  |            |
| Reivilo Formation | ~2,590 Myr | Dolostones with           | Shallow          | Beukes     |
| Farm              |            | interbedded shales;       | subtidal to      | (1987);    |
| Baviaanskrantz    |            | laminated dolostones      | intertidal       | Sumner     |
| S 28°35'16.9"     |            | pass up section to        | platform         | (2002);    |
| E 023°57'37.9"    |            | columnar and domal        |                  | Sumner     |
|                   |            | stromatolites             |                  | and        |
|                   |            | Monteville-Reivilo        |                  | Grotzinger |
|                   |            | sequence boundary         |                  | (2004)     |
|                   |            | marked by quartzose       |                  |            |
|                   |            | grainstone                |                  |            |
| Monteville        | ~2,600-    | Shallowing-upward         | Shallowing       | Beukes     |
| Formation         | 2,590 Myr  | shale-to-limestone        | from middle      | (1987);    |
| Farm Monteville   |            | cycles; shales rich in    | ramp (between    | Sumner     |
| S 28°35'50.7"     |            | molar-tooth structures    | storm and fair   | (2002);    |
| E 023°58'01.2"    |            | and interbedded with      | weather wave     | Sumner     |
|                   |            | grainstones (HCS,         | base) to inner   | and        |
|                   |            | wave ripples);            | ramp             | Grotzinger |
|                   |            | limestones up section     | (stromatolites); | (2004)     |
|                   |            | increasingly oolitic (bi- | peritidal at top |            |
|                   |            | directional cross         |                  |            |
|                   |            | bedding) and              |                  |            |
|                   |            | stromatolitic, mud        |                  |            |
|                   |            | cracks                    |                  |            |

---

|                   |           |                        |               |         |
|-------------------|-----------|------------------------|---------------|---------|
| Boomplaas         | ~2.610-   | Limestone, dolostone,  | Shallow to    | Beukes  |
| Formation         | 2,630 Myr | siltstones, shales;    | moderately    | (1987); |
| Schmidtsdrif-Ulco |           | common ooids and       | deep subtidal | Sumner  |
| road              |           | subtidal stromatolites |               | (2002)  |
| S 28°39'35.1", E  |           | associated with platy  |               |         |
| 024°01'44.1"      |           | breccias, HCS          |               |         |

### **Analytical Methods**

The extraction of carbonate-associated sulfate involved a two-step procedure. Up to 1500g of rock powder was repeatedly leached with 10% NaCl-solution, prior to dissolution with 6M HCl, liberating CAS. This was either first precipitated as barium sulfate and subsequently converted to silver sulfide (Ag<sub>2</sub>S) or directly reacted with Thode reagent (Thode et al., 1961), liberating H<sub>2</sub>S that was captured as ZnS and subsequently converted to Ag<sub>2</sub>S. Chromium-reducible sulfur was extracted from the mineral residue and precipitated as Ag<sub>2</sub>S (Canfield et al., 1986). Barium sulfate and silver sulfide precipitates from sulfides were measured for their  $\delta^{34}\text{S}$  values in Münster, Germany.

For multiple sulfur isotope analyses, silver sulfide was fluorinated to produce SF<sub>6</sub> (Johnston et al., 2005). All multiple sulfur isotope measurements were performed at the University of Maryland.

The  $\delta^{34}\text{S}$  values are presented in the standard delta notation against V-CDT with an analytical reproducibility of  $\leq 0.2\text{‰}$  in both laboratories. The  $\Delta^{33}\text{S}$  and  $\Delta^{36}\text{S}$  values are defined as  $\Delta^{33}\text{S} = 1000 \times ((^{33}\text{S}/^{32}\text{S})_{\text{sample}}/(^{33}\text{S}/^{32}\text{S})_{\text{ref}} - (^{34}\text{S}/^{32}\text{S})_{\text{sample}}/(^{34}\text{S}/^{32}\text{S})_{\text{ref}})^{0.515}$ , and  $\Delta^{36}\text{S} = 1000 \times ((^{36}\text{S}/^{32}\text{S})_{\text{sample}}/(^{36}\text{S}/^{32}\text{S})_{\text{ref}} - (^{34}\text{S}/^{32}\text{S})_{\text{sample}}/(^{34}\text{S}/^{32}\text{S})_{\text{ref}})^{1.9}$ . We report these values against an assumed  $\Delta^{33}\text{S}$  and

$\Delta^{36}\text{S}$  for V-CDT that yields  $\delta^{34}\text{S}$ ,  $\Delta^{33}\text{S}$  and  $\Delta^{36}\text{S}$  values for IAEA S-1 of  $\bar{0.3\text{‰}}$ ,  $\bar{0.094\text{‰}}$ , and  $\bar{0.69\text{‰}}$ . Uncertainties of  $\Delta^{33}\text{S}$  and  $\Delta^{36}\text{S}$  values by the  $\text{SF}_6$  technique are on the order of 0.01 and 0.2‰.

### Evaluation of data using non-steady state box models

We constructed a basic box model of the sulfur cycle in order to evaluate the transition from a non-mass dependent sulfur cycle to a sulfur cycle with higher oceanic sulfate concentrations and a strong influence of biological sulfate reduction (BSR). The structure of this model is given in Figure DR3 below.

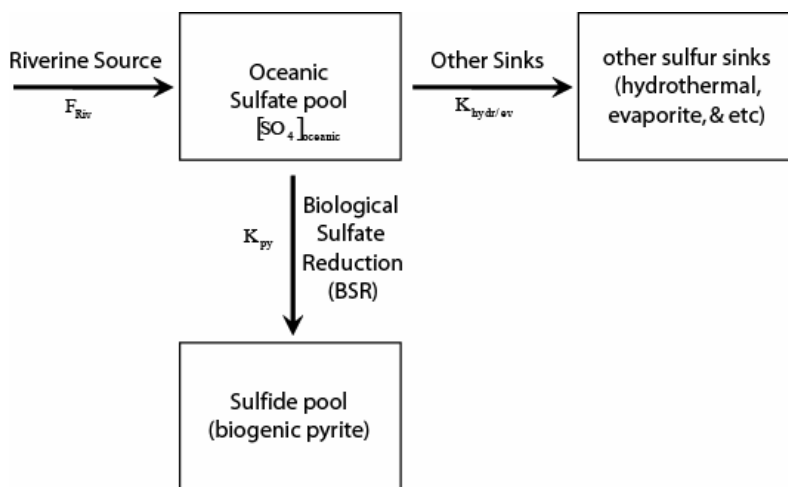

Figure DR3: Structure of sulfur cycle model used to evaluate whether the observations are consistent with non-steady state growth of a mass-dependent oceanic sulfate reservoir. Sulfur pools are labeled as boxes in this model and the transfer pathways are represented by the arrows. The flux of riverine sulfate is given by  $F_{\text{riv}}$ . The rate constants for BSR and other sulfate sinks are given by  $K_{\text{py}}$  and  $K_{\text{hydr/ev}}$ .

We make several simplifying assumptions about the rate constants that govern the sulfate sinks in this model in order to explore the response of this model to changes in the flux of riverine sulfate. The model assumes first order kinetic control on sulfate concentrations:

$$\frac{d[SO_4]_{oc}}{dt} = -(K_{py} + K_{hydr/ev})[SO_4]_{oc}, \quad (1a)$$

where  $K_{py}$  and  $K_{hydr/ev}$  are the first order rate constant for the sinks of oceanic sulfate and  $[SO_4]_{oc}$  is the concentration of sulfate in the oceanic pool.  $K_{py}$  is the rate constant describing the dependence of the sink attributable to biogenic pyrite formation and  $K_{hydr/ev}$  is the rate constant describing the dependence of the sink attributable to other sulfate sinks which are principally hydrothermal and evaporitic sulfate sinks. First order kinetics assumes that the magnitude of both of these sulfate sinks is linearly related to sulfate concentration in the oceans.

For the balance of sulfate in the oceanic sulfate pool:

$$\frac{d[SO_4]_{oc}}{dt} = F_{in} - F_{out} = F_{riv} - (K_{py} + K_{hydr/ev}) * [SO_4]_{oc} \quad (1b)$$

This model can be solved for changes in the concentration of oceanic sulfate with time ( $[SO_4]_{oc\_t}$ ) in terms of the initial oceanic sulfate concentration ( $[SO_4]_{oc\_i}$ ) using:

$$[SO_4]_{oc\_t} = \frac{F_{riv}}{K_{py} + K_{hydr/ev}} - \left( \frac{F_{riv}}{K_{py} + K_{hydr/ev}} - [SO_4]_{oc\_i} \right) e^{-(K_{py} + K_{hydr/ev})t}, \quad (2a)$$

where  $t$  refers to time. We have initialized this model with an initial sulfate concentration of ~300 micromolar (~1% of present concentrations and solved to yield a 12 Myr residence time for sulfate – similar to that observed in the present-day oceans). At steady state, and assuming the first order rate constants that we have assumed, this condition is met when the source terms for sulfate (riverine) are 1% of present levels. We have then explored the response of the model to a tenfold increase in the flux of riverine sulfate with a mass-dependent isotopic composition.

We recognize that the sulfate sulfur produced by oxidative weathering immediately after the rise of oxygen, may have a mass-independent component, but we assume a mass-dependent composition for two reasons. The process of oxidative weathering will integrate the signal which will tend toward near zero values of  $\Delta^{33}\text{S}$  and  $\Delta^{36}\text{S}$  values of zero, and the rise of oxygen will also facilitate weathering of igneous, sulfide minerals which may have accumulated on the continents. The parameters used in this solution are given as:

| Variable                                                                                                                                                                                                                                                                              | Value                              |
|---------------------------------------------------------------------------------------------------------------------------------------------------------------------------------------------------------------------------------------------------------------------------------------|------------------------------------|
| Initial $[\text{SO}_4]_{\text{oceanic}}$                                                                                                                                                                                                                                              | 0.3 mM* (300 $\mu\text{M}$ )       |
| $K_{\text{hydr/ev}}$                                                                                                                                                                                                                                                                  | $0.83\text{e-}8/\text{yr}^\dagger$ |
| $K_{\text{py}}$                                                                                                                                                                                                                                                                       | $7.49\text{e-}8/\text{yr}^\dagger$ |
| $F_{\text{riv}}$                                                                                                                                                                                                                                                                      | 3mM*/12e6yr                        |
| <p>* These values can be converted to more commonly used quantities (e.g. moles or grams by multiplying by the amount of water in the oceanic pool and appropriate conversions).</p> <p>† These values are derived assuming a 12 Myr residence time for the oceanic sulfate pool.</p> |                                    |

### **Incorporation of isotopes into the model**

In order to explore the response of the model when isotopes are included we started with an initial isotopic composition for the oceanic pool of  $\delta^{34}\text{S} = 17\text{‰}$ ,  $\Delta^{33}\text{S} = +2\text{‰}$ , and  $\Delta^{36}\text{S} = -1.6\text{‰}$ . This composition was chosen to be slightly more  $^{34}\text{S}$  and  $^{33}\text{S}$  enriched than the non mass-dependent Deutschland data. We note that this composition is different from that observed in older Archean sediments (Ono et al.,

2003; Kaufman et al., 2007). A composition like this might result in cases where the sulfate pool carries an isotopic signature of sulfate reduction.

We then note that a solution can be obtained by solving this system for each of the isotopes and noting that the equations for the different isotopes of sulfur can be coupled using the fractionation factors for BSR given by:

$$^{34}\alpha_{\text{BSR}} = \frac{\left( \frac{^{34}\text{S}}{^{34}\text{S}} \right)_{\text{py}}}{\left( \frac{^{34}\text{S}}{^{34}\text{S}} \right)_{\text{SO}_4}}, \quad (4a)$$

$$^{33}\alpha_{\text{BSR}} = \left( ^{34}\alpha_{\text{BSR}} \right)^{\lambda_3}, \text{ and} \quad (5a)$$

$$^{36}\alpha_{\text{BSR}} = \left( ^{34}\alpha_{\text{BSR}} \right)^{\lambda_6}, \quad (6a)$$

where  $\alpha$  is a fractionation factor and  $\lambda_3$  and  $\lambda_6$  are the exponents that relate the fractionation factors for the different isotopes. We couple the equations using a trace abundance approximation which assumes that  $K_{\text{py}}$  applies for  $^{32}\text{S}$  and that  $^{34}\alpha_{\text{BSR}} * K_{\text{py}}$ ,  $^{33}\alpha_{\text{BSR}} * K_{\text{py}}$ , and  $^{36}\alpha_{\text{BSR}} * K_{\text{py}}$  apply for  $^{34}\text{S}$ ,  $^{33}\text{S}$ , and  $^{36}\text{S}$ , respectively. The model assigns a dependence between the fractionation factors and sulfate concentration that is empirically derived from data presented in Habicht et al. (2002). Because of the dependence of the fractionation factor on concentration, we solved the model using numerical techniques, stepping the model forward with a 1 year time step for 200 million years. We checked the results of the model with the analytical solution using constant values for the fractionation factors.

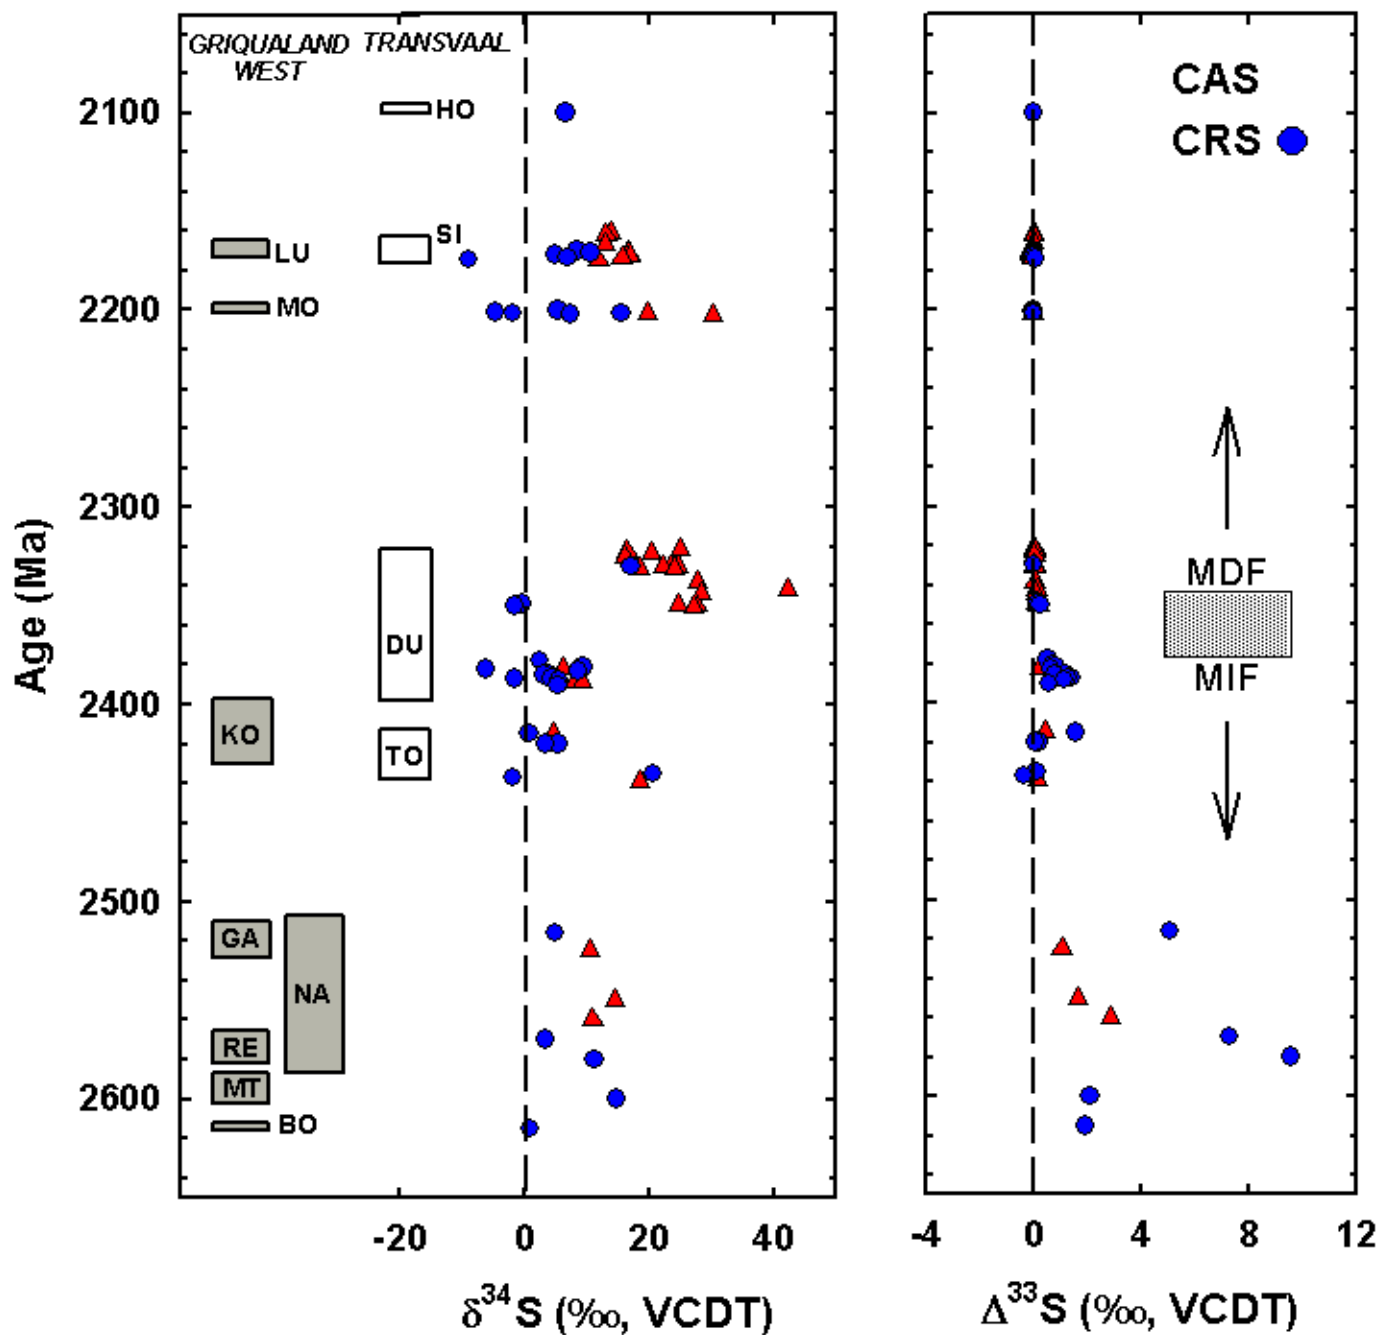

Figure DR4: Temporal variations in  $\delta^{34}\text{S}_{\text{CAS}}$  and  $\delta^{34}\text{S}_{\text{CRS}}$  (left panel) and  $\Delta^{33}\text{S}$  values (right panel) for carbonates from the Transvaal Supergroup. A transitional band is shown to indicate the decline in non-mass dependent fractionation (MIF) likely associated with the onset of the GOE. MDF = Mass-dependent fractionation. CAS=Carbonate-associated sulfate, CRS=Chromium-reducible sulfur. HO = Houtenbek; SI = Silverton, LU = Lucknow, MO = Moodraai, DU = Deutschland, KO = Koegas Subgroup, TO = Tongwane, NA = Nauga, GA = Gamohaam, RE = Reivilo, MT = Monteville, BO = Boomplaas.

## Comparison of model results with observations

Sulfur isotope compositions of carbonate-associated sulfate (CAS) and chromium-reducible sulfur (CRS) throughout the Transvaal Supergroup are presented in Figure DR4. Solutions to our model calculations are given in Figures DR5 and DR6 and indicate that the model can capture several broad features that are present in the data. The inclusion of a concentration-dependent fractionation factor in the model yields generally smaller fractionations between sulfate and sulfide when MIF is present and a divergence in values for  $\delta^{34}\text{S}$  and  $\Delta^{36}\text{S}$  from  $\Delta^{33}\text{S}$  of sulfate and sulfide as the system evolves from MIF to MDF and higher  $\text{SO}_4$  concentration. There are features of the data that the model does not reproduce such as a trajectory for the data and this is taken as an indication that the natural system is more complex than the model. The model also does not reproduce the scatter in the CRS data, the positive  $^{34}\text{S}$  of many of the chrome reducible sulfur, and the strongly positive  $\delta^{34}\text{S}$  of one CAS Duitschland Formation sample. We suggest that these features indicate that a more complex scenario may be necessary to reproduce the data, possibly one with non-conservative behavior of sulfate in the oceanic sulfate pool (geographic variability) such as has been suggested before (Kaufman et al., 2007; Logan et al., 1995; Johnston et al., 2006).

## Insight from free parameters

While some of the constraints on the model were chosen to be consistent with independent criteria other constraints were chosen to fit the model to the data. These are considered to be free parameters and include the initial composition of the sulfate and the fraction of pyrite burial (assumed to be 90% of the total sink ( $K_{\text{py}}/(K_{\text{py}} +$



$K_{\text{hydr/ev}}$ )). The choice of these values may carry implications for evaluation of the Deutschland Formation S isotope record.

The initial composition of the sulfate pool chosen in the model has a positive rather than negative  $\Delta^{33}\text{S}$  values in contrast to previous suggestions (Farquhar et al. 2000, 2003, 2005). The positive  $\Delta^{33}\text{S}$  may be an important feature of the initial oxidation of emergent sulfide-bearing rocks, or it may represent some other process that remains to be identified.

The fraction of pyrite burial (90% of the total sulfate sink) is high. We think this value may imply that the model is too simple and that a more complex model is required.

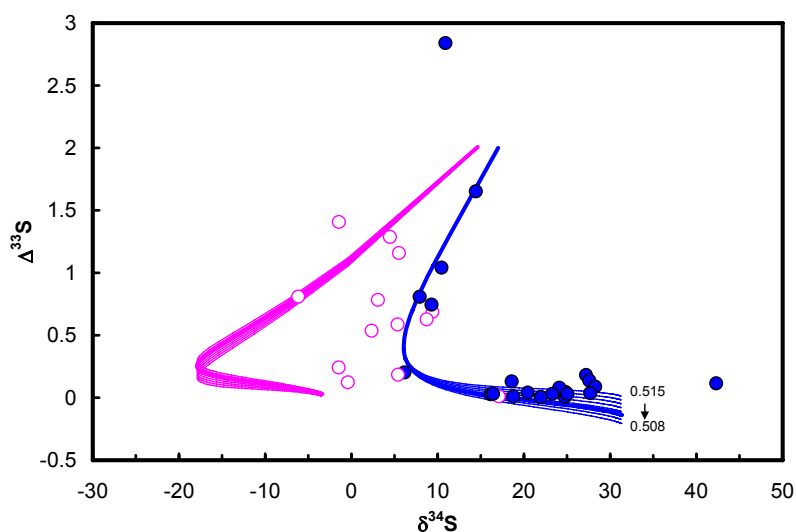

Figure DR5: Plot of  $\Delta^{33}\text{S}$  vs  $\delta^{34}\text{S}$  with model results (lines) and data from Deutschland and Malmani formations on Deutschland Farm. Filled blue symbols are the sulfate and unfilled purple symbols are the Chrome-reducible sulfide. The thin lines are calculated for sulfate and sulfide using a variety of theoretical exponents for predictions of sulfate reduction extending from 0.515 to 0.508 for  $\lambda_3$ . The two thick lines are calculated for sulfate and sulfide using measured exponents for sulfate reduction from Johnston et al. 2007.

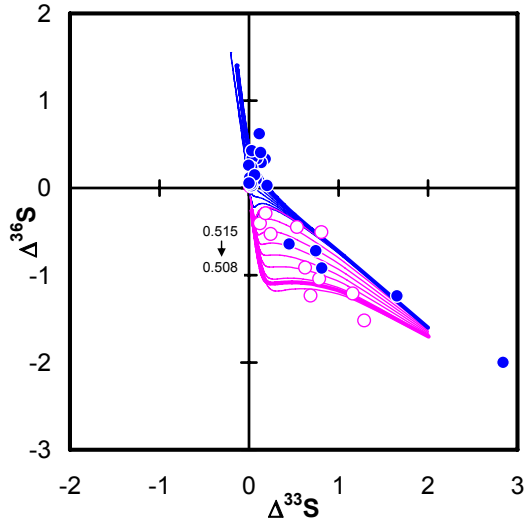

Figure DR6: Plot of  $\Delta^{36}\text{S}$  vs  $\Delta^{33}\text{S}$  with model results (lines) and data from Duitschland and Malmani formations on Duitschland Farm. Filled blue symbols are the sulfate and unfilled purple symbols are the Chrome-reducible sulfide. The thin lines are calculated for sulfate and sulfide using a variety of theoretical exponents for predictions of sulfate reduction extending from 0.515 to 0.508 for  $\lambda_3$ . The two thick lines are calculated for sulfate and sulfide using measured exponents for sulfate reduction from Johnston et al. (2007).

Assuming the catabolism of aerobic respirer is limited only by  $\text{O}_2$  (Jin and Bethke, 2005), just as it might have occurred right before the oxygen rise in Precambrian time, the rates ( $r$ ) of aerobic respiration can be described according to the Monod equation (Eq 7)  $r = k \cdot [X] \cdot [\text{O}_2] / ([\text{O}_2] + K_A)$  where  $k$  is the rate constant,  $[X]$  is biomass concentration,  $[\text{O}_2]$  is dissolved oxygen concentration, and  $K_A$  is half-saturation constant.

Concurrently with respiration, microorganisms synthesize their biomass, increasing  $[X]$ , (Eq 8)  $d[X]/dt = Y \cdot r - D \cdot [X]$  where  $Y$  is the growth yield and  $D$  is the decay constant. Note that in order to survive in the environment, the growth rate must be maintained positive, i.e.,  $d[X]/dt > 0$ .

Based on our current understanding of modern aerobic respirer, we can take

average values of  $k = 1.0\text{E}6 \text{ mol/g/sec}$   $K_A = 1.0\text{E}-8 \text{ mol/liter}$

$Y = 15 \text{ g/mol}$   $D = 1.0\text{E}-7 \text{ 1/sec.}$

These values are based on laboratory measurements, not any assumptions.

Substituting these values into the equations and note that  $d[X]/dt > 0$ , we

can calculate a minimum value required by aerobic microbes to evolve on Earth:

$[\text{O}_2]_{\text{min}} = 6.7\text{E}-11 \text{ mol/liter}$ , which is about  $8.8\text{E}-8 \text{ atm}$  of  $\text{O}_2$ .

If the constraints of electron donors, such as acetate and  $\text{H}_2$  (two dominant substrates in the environment), are considered, the minimum value may increase about 10 to 100 fold, i.e.,  $10^{-6}$  to  $10^{-5} \text{ atm}$ .

## REFERENCES CITED

- Bau, M., Romer, R. L., Lüders, V. and Beukes, N. J., 1999, Pb, O, and C isotopes in silicified Mooidraai dolomite (Transvaal Supergroup, South Africa): implications for the composition of Paleoproterozoic seawater and 'dating' the increase of oxygen in the Precambrian atmosphere: *Earth and Planetary Science Letters*, v. 174, p. 43-57.
- Bekker, A., Kaufman, A. J., Karhu, J. A., Beukes, N. J., Swart, Q. D., Coetzee, L. L. and Eriksson, K. A., 2001, Chemostratigraphy of the Paleoproterozoic Duitschland Formation, South Africa: Implications for coupled climate change and carbon cycling: *American Journal of Science*, v. 301, p. 261-285.
- Beukes, N. J., Dorland, H. C., Gutzmer, J., Nedachi, M. and Ohmoto, H., 2002, Tropical laterites, life on land, and the history of atmospheric oxygen in the Paleoproterozoic: *Geology*, v. 30, p. 491-494.
- Beukes, N. J., 1978, Die karbonaatgesteentes en ysterformasies van die Ghaap-Groep van die Transvaal-Supergroep in Noord-Kaapland. Ph.D. Thesis, Rand

- Afrikaans University, Johannesburg, 580 p.
- Beukes, N. J., 1979, Litostratigrafiese onderverdeling van die Schmitsdrif-subgroep van die Ghaap-groep in noord-Kaapland: Transactions of the Geological Society of South Africa, v. 82, p. 313-327.
- Beukes, N. J., 1983, Palaeoenvironmental setting of iron-formations in the depositional basin of the Transvaal Supergroup, South Africa. In: Trendall, A.F. and Morris, R.C. (Trendall, A.F. and Morris, R. C. (Trendall, A.F. and Morris, R. C.s) Iron formation: facts and problems. Developments in Precambrian Geology, v. 6, Elsevier, Amsterdam, p.131-209.
- Beukes, N. J., 1984, Sedimentology of the Kuruman and Griquatown iron-formations, Transvaal Supergroup, Griqualand West, South Africa: Precambrian Research, v. 24, p. 47-84.
- Beukes, N. J., 1987, Facies relations, depositional environments and diagenesis in a major Early Proterozoic stromatolitic carbonate platform to basin sequence, Campbellrand Subgroup, Transvaal Supergroup, Southern Africa: Sedimentary Geology, v. 54, p.1-46.
- Beukes, N. J., Klein, C., Kaufman, A. J. and Hayes, J. M., 1990, Carbonate petrography, kerogen distribution, and carbon and oxygen isotope variations in an Early Proterozoic transition from limestone to iron-formation deposition, Transvaal Supergroup, South Africa: Economic Geology, v. 85, p. 663-690.
- Beukes, N. J. and Smit, C. A., 1987, New evidence for thrust faulting in Griqualand West, South Africa: implications for stratigraphy and the age of red beds. South African Journal of Geology 90, 378-394.
- Button, A., 1973a, The depositional history of the Wolkberg proto-basin, Transvaal: Transactions of the Geological Society of South Africa, v. 76, p.15-25.
- Button, A., 1973b, A regional study of the stratigraphy and development of the

- Transvaal basin in the eastern and northeastern Transvaal. PhD, University of the Witwatersrand, Johannesburg, 352 p.
- Button, A. and Vos, R. G., 1977, Subtidal and intertidal clastic and carbonate sedimentation in a macrotidal environment: an example from the Lower Proterozoic of South Africa: *Sedimentary Geology*, v. 18, p.175-200.
- Canfield, D.E., Raiswell, R., Westrich, J., Reaves, C., and Berner, R.A., 1986, The use of chromium reduction in the analysis of inorganic sulfur in sediments and shales: *Chemical Geology*, v. 54, p. 149–155, doi: 10.1016/0009-2541(86)90078-1.
- Cairncross, B. C., Beukes, N. J. and Gutzmer, J., 1997, *The Manganese Adventure: The South African Manganese Fields*. Associated Ore and Metal Corporation, Johannesburg.
- Coetzee, L. L., Beukes, N.J., Gutzmer, J. and Kakegawa, T., 2006, Links of organic carbon cycling and burial to depositional depth gradients and establishment of a snowball Earth at 2.3 Ga. Evidence from the Timeball Hill Formation, Transvaal Supergroup, South Africa: *South African Journal of Geology*, v. 109, p. 109-122.
- Cornell, D. H., Armstrong, R.A. and Walraven, F., 1998, Geochronology of the Proterozoic Hartley Basalt Formation, South Africa: constraints on the Kheis tectogenesis and the Kaapvaal Craton's earliest Wilson Cycle: *Journal of African Earth Sciences*, v. 26, p. 5-27.
- Cornell, D. H., Schütte, S. S. and Eglington, B. L., 1996, The Ongeluk basaltic andesite formation in Griqualand West, South Africa: submarine alteration in a 2222 Ma Proterozoic sea: *Precambrian Research*, v. 79, p. 101-123.
- Dorland, H. C., 2004, Provenance ages and timing of sedimentation of selected Neoarchean and Paleoproterozoic successions on the Kaapvaal Craton. Ph.D.

- Thesis, Rand Afrikaans University, Johannesburg, 326 p.
- Eriksson, P. G., Altermann, W., Eberhardt, L., Arend-Heidbrinck, S. and Bumby, A.J., 2002, Palaeoproterozoic epeiric sea palaeoenvironments: the Silverton Formation (Pretoria Group, Transvaal Supergroup), South Africa. In: Altermann, W. and Corcoran, P.L. (eds) Precambrian Sedimentary Environments: a modern approach to ancient depositional systems: Special Publication of the International Association of Sedimentologists, v. 33, p. 351-367.
- Eriksson, K. A., Simpson, E.L., Master, S. and Henry, G., 2005, Neoproterozoic (c. 2.58 Ga) halite casts: implications for palaeoceanic chemistry: Journal of the Geological Society, London, v. 162, p. 789-799.
- Farquhar, J., Bao, H. M. and Thiemens, M., 2000, Atmospheric influence of Earth's earliest sulfur cycle: Science, v. 289, p. 756-758.
- Farquhar, J. and Wing, B. A., 2003, Multiple sulfur isotopes and the evolution of the atmosphere: Earth and Planetary Science Letters, v. 213, p. 1–13.
- Farquhar, J. and Wing, B. A. , 2005, in Mineral Deposits and Earth Evolution (eds McDonald, I., Boyce, A. J., Butler, I. B., Herrington, R. J. and Polya, D. A.) 167–177 (Spec. Publ. 248, Geological Society, London.
- Gutzmer, J. and Beukes, N. J., 1998, High grade manganese ores in the Kalahari manganese field: Characterisation and dating of ore forming events. Unpublished Report, Rand Afrikaans University, Johannesburg, 221 p.
- Habicht, K. S., Gade, M., Thamdrup, B., Berg, P. and Canfield, D. E., 2002, A calibration of sulfate levels in the Archean ocean: Science, v. 298, p. 2372-2374.
- Hannah, J. L., Bekker, A., Stein, H. J., Markey, R. J. and Holland, H. D., 2004, Primitive Os and 2316 Ma age for marine shale: implications for

- Paleoproterozoic glacial events and the rise of atmospheric oxygen: *Earth and Planetary Science Letters*, v. 225, p. 43-52.
- Jin, Q., Bethke, C. M., 2005, Predicting the rate of microbial respiration in geochemical environments: *Geochimica et Cosmochimica Acta*, v. 69, p. 1133-1143.
- Johnston, D. T., Wing, B. A., Farquhar, J., Kaufman, A. J., Strauss, H., Lyons, T. W., Kah, L. C., and Canfield, D. E., 2005, Active microbial sulfur disproportionation in the Mesoproterozoic: *Science*, v. 310, p.1477-1479.
- Johnston, D. T. et al., 2006, Evolution of the oceanic sulphur cycle at the end of the Paleoproterozoic: *Geochimica et Cosmochimica Acta*, v. 70, p. 5723-5739.
- Johnston, D. T., Farquhar, J. and Canfield, D. E., 2007, Sulfur isotope insights into microbial sulfate reduction: When microbes meet models: *Geochimica et Cosmochimica Acta*, v. 71, p. 3929-3947.
- Karhu, J. A. and Holland, H. D., 1996, Carbon isotopes and the rise of atmospheric oxygen: *Geology*, v. 24, p. 867-870.
- Kaufman, A. J., Johnston, D. T., Farquhar, J., Masterson, A., Lyons, T. W., Bates, S., Anbar, A. D., Arnold, G. L., Garvin, J. and Buick, R., 2007, Late Archean Biospheric Oxygenation and Atmospheric Evolution: *Science*, v. 317, p. 1900-1903.
- Logan, G. A., Hayes, J. M., Hieshima, G. B. and Summons, R. E., 1995, Terminal Proterozoic reorganization of biogeochemical cycles: *Nature*, v. 376, p. 53-56.
- Martin, D. M., Clendenin, C. W., Krapez, B. and McNaughton, N. J., 1998, Tectonic and geochronological constraints on late Archaean and Palaeoproterozoic stratigraphic correlation within and between the Kaapvaal and Pilbara cratons: *Journal of the Geological Society, London*, v. 155, p. 311-322.
- Ono, S., Eigenbrode, J. L., Pavlov, A. A., Kharecha, P., Rumble, D. III, Kasting, J. F.

- and Freeman, K. H., 2003, New insights into Archean sulfur cycle from mass-independent sulfur isotope records from the Hamersley Basin, Australia: *Earth and Planetary Science Letters*, v. 213, p.15-30.
- Pickard, A. L., 2003, SHRIMP U–Pb zircon ages for the Palaeoproterozoic Kuruman Iron Formation, Northern Cape Province, South Africa: evidence for simultaneous BIF deposition on Kaapvaal and Pilbara Cratons: *Precambrian Research*, v.125, p. 275-315.
- Polteau, S., Moore, J. M. and Tsikos, H., 2006, The geology and geochemistry of the Palaeoproterozoic Makganyene diamictite: *Precambrian Research*, v. 148, p. 257-274.
- Schneiderhan, E. A., Gutzmer, J., Strauss, H., Mezger, K. and Beukes, N. J., 2006, The chemostratigraphy of a Paleoproterozoic MnF-BIF succession - the Voelwater Subgroup of the Transvaal Supergroup in Griqualand West, South Africa: *South African Journal of Geology*, v. 109, p. 63-80.
- Schreiber, U. M. and Eriksson, P. G., 1992, The sedimentology of the post-Magaliesberg formations of the Pretoria Group, Transvaal Sequence, in the eastern Transvaal: *South African Journal of Geology*, v. 95, p.1-16.
- Schröder, S., Bekker, A., Beukes, N. J., Strauss, H. and van Niekerk, H. S., 2008, Sulfate evaporites in the ~2.2–2.1 Gyr shallow-marine Lucknow Formation, South Africa: evidence for the rise in seawater sulfate concentration in association with the Paleoproterozoic positive carbon isotope excursion. *Terra Nova*, v. 20, (2), p. 108-117.
- Sumner, D.Y., 2002, Neoproterozoic carbonates: Clues to early life and early ocean chemistry. Excursion Guide: 16th International Sedimentological Conference, International Association of Sedimentologists, Johannesburg, 24 p.
- Sumner, D. Y. and Beukes, N. J., 2006, Sequence stratigraphic development of the



- Neoarchean Transvaal carbonate platform, Kaapvaal Craton, South Africa:  
South African Journal of Geology, v. 109, p.11-22.
- Sumner, D.Y. and Bowring, S. A., 1996, U-Pb geochronologic constraints on  
deposition of the Campbellrand Subgroup, Transvaal Supergroup, South  
Africa: Precambrian Research, v. 79, p. 25-35.
- Sumner, D. Y. and Grotzinger, J. P., 2004, Implications for Neoarchean ocean  
chemistry from primary carbonate mineralogy of the Campbellrand-Malmani  
Platform, South Africa: Sedimentology, v. 51, p. 1273-1299.
- Swart, Q. D., 1999, Carbonate rocks of the Paleoproterozoic Pretoria and  
Postmasburg Groups, Transvaal Supergroup. MSc Thesis, Rand Afrikaans  
University, Johannesburg, 126 p.
- Thode, H.G., Monster, J., and Dunford, H.B., 1961, Sulphur isotope geochemistry:  
Geochimica et Cosmochimica Acta, v. 25, p. 159–174, doi: 10.1016/0016-  
7037(61)90074-6.
- Van Niekerk, H. S., 2006, The origin of the Kheis terrane and its relationship with the  
Archean Kaapvaal Craton and the Grenvillian Namaqua Province in southern  
Africa. PhD Thesis, University of Johannesburg, Johannesburg, 403 p.
- Walraven, F., 1997, Geochronology of the Rooiberg Group, Transvaal Supergroup,  
South Africa. Economic Geology Research Unit Information Circular,  
University of the Witwatersrand, Johannesburg, 21 p.
- Walraven, F. and Martini, J., 1995, Zircon Pb-evaporation age determinations of the  
Oak Tree Formation, Chuniesport Group, Transvaal Sequence: Implications  
for Transvaal-Griqualand West basin correlations: South African Journal of  
Geology, v. 98, p. 58-67.



1 Table DR1: Results of elemental and isotopic analyses of samples from the Transvaal Supergroup, South Africa

| Sample | lithology                                              | Unit name     | Age  | $\delta^{33}\text{S}_{\text{CAS}}$ | $\delta^{34}\text{S}_{\text{CAS}}$ | $\delta^{36}\text{S}_{\text{CAS}}$ | $\Delta^{33}\text{S}_{\text{CAS}}$ | $\Delta^{36}\text{S}_{\text{CAS}}$ | $\delta^{33}\text{S}_{\text{CRS}}$ | $\delta^{34}\text{S}_{\text{CRS}}$ | $\delta^{36}\text{S}_{\text{CRS}}$ | $\Delta^{33}\text{S}_{\text{CRS}}$ | $\Delta^{36}\text{S}_{\text{CRS}}$ | $\delta^{13}\text{C}_{\text{CARB}}$ | $\delta^{18}\text{O}_{\text{CARB}}$ |
|--------|--------------------------------------------------------|---------------|------|------------------------------------|------------------------------------|------------------------------------|------------------------------------|------------------------------------|------------------------------------|------------------------------------|------------------------------------|------------------------------------|------------------------------------|-------------------------------------|-------------------------------------|
|        |                                                        |               | (Ma) | (‰, VCDT)                          |                                    |                                    |                                    |                                    |                                    |                                    |                                    | (‰, VPDB)                          |                                    |                                     |                                     |
| Rie1-1 | Stromatolitic<br>limestone,<br>contact<br>metamorphism | Houtenbek Fm. | 2100 |                                    |                                    |                                    |                                    |                                    | 3.400                              | 6.572                              | 12.56                              | 0.021                              | 0.04                               | -1.6                                | -18.1                               |
| Ven 6  | Micritic<br>dolomite                                   | Lucknow Fm.   | 2161 | 7.134                              | 13.897                             | 26.26                              | 0.001                              | -0.31                              |                                    |                                    |                                    |                                    |                                    | 8.8                                 | -9.3                                |
| Ven 5  | Micritic<br>dolomite                                   | Lucknow Fm.   | 2162 | 6.706                              | 13.084                             | 24.73                              | -0.012                             | -0.27                              |                                    |                                    |                                    |                                    |                                    | 9.1                                 | -9.1                                |
| Ven 7  | Micritic<br>dolomite                                   | Lucknow Fm.   | 2166 | 6.649                              | 12.978                             | 24.59                              | -0.014                             | -0.21                              |                                    |                                    |                                    |                                    |                                    | 10                                  | -8.6                                |
| Mog1   | recrystallized<br>dolomite,<br>laminated               | Silverton Fm. | 2170 | 8.370                              | 16.622                             | 31.80                              | -0.156                             | -0.01                              | 4.340                              | 8.480                              | 16.10                              | -0.018                             | -0.08                              | 9.8                                 | -12.9                               |
| Mog2   | recrystallized<br>dolomite,<br>laminated               | Silverton Fm. | 2171 | 8.448                              | 16.784                             | 32.02                              | -0.161                             | -0.11                              | 5.430                              | 10.579                             | 19.96                              | -0.005                             | -0.24                              | 10                                  | -13.4                               |
| Mog3   | recrystallized<br>dolomite,<br>laminated               | Silverton Fm. | 2172 | 8.562                              | 17.002                             | 32.44                              | -0.158                             | -0.11                              | 2.522                              | 4.903                              | 9.15                               | 0.000                              | -0.24                              | 9.6                                 | -13.4                               |

|       |                                 |                 |      |        |        |       |        |       |        |        |        |        |       |      |       |
|-------|---------------------------------|-----------------|------|--------|--------|-------|--------|-------|--------|--------|--------|--------|-------|------|-------|
|       | recrystallized                  |                 |      |        |        |       |        |       |        |        |        |        |       |      |       |
| Mog4  | dolomite,<br>laminated          | Silverton Fm.   | 2173 | 7.918  | 15.575 | 29.42 | -0.072 | -0.38 | 3.577  | 6.970  | 13.10  | -0.007 | -0.18 | 9.7  | -10.9 |
|       | recrystallized                  |                 |      |        |        |       |        |       |        |        |        |        |       |      |       |
| Mog5  | dolomite,<br>laminated          | Silverton Fm.   | 2174 | 6.015  | 11.822 | 22.40 | -0.056 | -0.18 | -4.630 | -9.057 | -16.71 | 0.045  | 0.43  | 8.9  | -12.3 |
|       | ferruginous                     |                 |      |        |        |       |        |       |        |        |        |        |       |      |       |
| M10-1 | dolomite,<br>laminated          | Mooidraai Fm.   | 2202 |        |        |       |        |       | 2.772  | 5.423  | 11.03  | -0.017 | 0.7   | -1.4 | -9    |
| M10-2 | massive<br>dolomite             | Mooidraai Fm.   | 2201 |        |        |       |        |       | -2.399 | -4.570 | -7.91  | -0.043 | 0.76  | -1.1 | -6.4  |
| M10-3 | massive<br>dolomite             | Mooidraai Fm.   | 2200 | 10.096 | 19.694 | 37.91 | 0.002  | 0.16  | 7.980  | 15.578 | 29.99  | -0.013 | 0.19  | 0.2  | -3.1  |
| M10-4 | massive<br>dolomite             | Mooidraai Fm.   | 2200 |        |        |       |        |       | -0.992 | -1.942 | -3.61  | 0.009  | 0.07  | 0.5  | -2.1  |
| M10-5 | massive<br>dolomite             | Mooidraai Fm.   | 2200 | 15.403 | 30.220 | 58.28 | -0.048 | 0.08  | 3.808  | 7.389  | 14.31  | 0.009  | 0.22  | -0.1 | -2.1  |
| DF 21 | massive<br>dolomite             | Duitschland Fm. | 2321 | 12.850 | 25.042 | 48.5  | 0.031  | 0.4   |        |        |        |        |       | 6.5  | -19.6 |
| DF 22 | fine-grained<br>dolomite        | Duitschland Fm. | 2322 | 8.464  | 16.439 | 31.5  | 0.031  | 0.0   |        |        |        |        |       | 6.1  | -16   |
| DF 15 | limestone with<br>discontinuous | Duitschland Fm. | 2323 | 10.513 | 20.435 | 39.3  | 0.041  | 0.1   |        |        |        |        |       | 7.8  | -13.4 |

[illegible]



|       |                                                      |                 |      |       |       |      |       |     |        |        |        |       |       |      |        |
|-------|------------------------------------------------------|-----------------|------|-------|-------|------|-------|-----|--------|--------|--------|-------|-------|------|--------|
|       | limestone                                            |                 |      |       |       |      |       |     |        |        |        |       |       |      |        |
|       | stromatolitic                                        |                 |      |       |       |      |       |     |        |        |        |       |       |      |        |
| Dui2  | limestone,<br>locally cherty<br>and cuprous          | Duitschland Fm. | 2350 |       |       |      |       |     | -0.519 | -1.476 | -3.33  | 0.242 | -0.53 | 2.6  | -11.3  |
|       | siltstone with                                       |                 |      |       |       |      |       |     |        |        |        |       |       |      |        |
| DF 5  | disseminated<br>pyrite                               | Duitschland Fm. | 2378 |       |       |      |       |     | 1.745  | 2.349  | 4.0    | 0.537 | -0.4  |      |        |
|       | sucrosic                                             |                 |      |       |       |      |       |     |        |        |        |       |       |      |        |
| Dui14 | dolomite,<br>massive                                 | Duitschland Fm. | 2381 |       |       |      |       |     | 5.512  | 9.389  | 16.68  | 0.688 | -1.23 | -1.7 | -12.3  |
|       | stromatolitic<br>dolomite                            |                 |      |       |       |      |       |     |        |        |        |       |       |      |        |
| Dui15 |                                                      | Duitschland Fm. | 2382 |       |       |      |       |     | -2.364 | -6.154 | -12.17 | 0.810 | -0.51 | 1.9  | -13.2  |
|       | massive<br>dolomite                                  |                 |      |       |       |      |       |     |        |        |        |       |       |      |        |
| DF 18 |                                                      | Duitschland Fm. | 2382 | 3.373 | 6.166 | 11.8 | 0.203 | 0.0 |        |        |        |       |       | 0.01 | -10.03 |
|       | sucrosic                                             |                 |      |       |       |      |       |     |        |        |        |       |       |      |        |
| Dui16 | dolomite,<br>massive                                 | Duitschland Fm. | 2383 |       |       |      |       |     | 5.107  | 8.718  | 15.72  | 0.627 | -0.91 | -1.4 | -11.8  |
|       | cherty pelite<br>with<br>concentrations<br>of pyrite |                 |      |       |       |      |       |     |        |        |        |       |       |      |        |
| DF 4  |                                                      | Duitschland Fm. | 2385 |       |       |      |       |     |        |        |        |       |       |      |        |
|       |                                                      |                 |      |       |       |      |       |     | 3.232  | 3.984  | 6.2    | 1.183 | -1.4  |      |        |
| Dui17 | sucrosic                                             | Duitschland Fm. | 2385 |       |       |      |       |     | 2.363  | 3.069  | 4.80   | 0.784 | -1.04 | -1.4 | -12.3  |

|        |                                              |                 |      |       |       |       |       |       |       |        |       |       |       |       |        |
|--------|----------------------------------------------|-----------------|------|-------|-------|-------|-------|-------|-------|--------|-------|-------|-------|-------|--------|
|        | dolomite,<br>stromatolitic<br>calcareous     |                 |      |       |       |       |       |       |       |        |       |       |       |       |        |
| DF 2   | mudstone with<br>concentrations<br>of pyrite | Duitschland Fm. | 2387 |       |       |       |       |       | 0.656 | -1.457 |       | 1.407 |       |       |        |
|        | calcareous                                   |                 |      |       |       |       |       |       |       |        |       |       |       |       |        |
| DF 3   | mudstone with<br>concentrations<br>of pyrite | Duitschland Fm. | 2387 |       |       |       |       |       | 3.583 | 4.462  | 7.0   | 1.288 | -1.5  |       |        |
| Dui18  | Calcareous<br>mudstone                       | Duitschland Fm. | 2388 | 4.963 | 8.072 | 14.47 | 0.814 | -0.92 | 3.993 | 5.509  | 9.28  | 1.159 | -1.21 |       |        |
|        | massive                                      |                 |      |       |       |       |       |       |       |        |       |       |       |       |        |
| DF 17  | limestone with<br>minor chert<br>layers      | Duitschland Fm. | 2388 |       |       |       |       |       |       |        |       |       |       | -1.71 | -11.02 |
|        | calcareous                                   |                 |      | 5.518 | 9.287 | 17.0  | 0.746 | -0.7  |       |        |       |       |       |       |        |
| DF 1   | mudstone with<br>concentrations<br>of pyrite | Duitschland Fm. | 2390 |       |       |       |       |       | 3.343 | 5.359  |       | 0.586 |       |       |        |
| DF 28  | laminated<br>mudstone                        | Duitschland Fm. | 2390 |       |       |       |       |       | 2.968 | 5.411  | 10.0  | 0.185 | -0.3  |       |        |
| Koe 4* | ferruginous                                  | Koegas Fm.      | 2415 | 2.858 | 4.683 | 8.28  | 0.449 | -0.64 | 1.943 | 0.741  | -0.54 | 1.562 | -1.95 | -10.8 | -18.6  |



|        |                   |              |      |       |        |      |       |        |        |       |        |       |      |       |
|--------|-------------------|--------------|------|-------|--------|------|-------|--------|--------|-------|--------|-------|------|-------|
|        | cherty sucrosic   |              |      |       |        |      |       |        |        |       |        |       |      |       |
|        | dolomite,         |              |      |       |        |      |       |        |        |       |        |       |      |       |
|        | strong            |              |      |       |        |      |       |        |        |       |        |       |      |       |
|        | recrystallization |              |      |       |        |      |       |        |        |       |        |       |      |       |
|        | ferruginous       |              |      |       |        |      |       |        |        |       |        |       |      |       |
|        | cherty sucrosic   |              |      |       |        |      |       |        |        |       |        |       |      |       |
| Koe 2* | dolomite,         | Koegas Fm.   | 2420 |       |        |      |       | 1.809  | 3.379  | 6.53  | 0.070  | 0.09  | -9   | -17   |
|        | strong            |              |      |       |        |      |       |        |        |       |        |       |      |       |
|        | recrystallization |              |      |       |        |      |       |        |        |       |        |       |      |       |
|        | ferruginous       |              |      |       |        |      |       |        |        |       |        |       |      |       |
| San 2* | limestone,        | Koegas Fm.   | 2430 |       |        |      |       |        |        |       |        |       | -5.6 | -13.6 |
|        | sparitic,         |              |      |       |        |      |       |        |        |       |        |       |      |       |
|        | stromatolitic     |              |      |       |        |      |       |        |        |       |        |       |      |       |
| Ton7   | stromatolitic     | Tongwane Fm. | 2435 |       |        |      |       | 10.705 | 20.668 | 39.88 | 0.114  | 0.25  | -0.8 | -11.9 |
|        | dolomite          |              |      |       |        |      |       |        |        |       |        |       |      |       |
|        | ferruginous       |              |      |       |        |      |       |        |        |       |        |       |      |       |
| Ton2*  | dolomite,         | Tongwane Fm. | 2437 |       |        |      |       | -1.365 | -1.960 | -3.68 | -0.355 | 0.04  |      |       |
|        | recrystallized    |              |      |       |        |      |       |        |        |       |        |       |      |       |
|        | massive           |              |      |       |        |      |       |        |        |       |        |       |      |       |
|        | dolomite          | Tongwane Fm. | 2439 |       |        |      |       |        |        |       |        |       |      |       |
|        | overlying chert   |              |      |       |        |      |       |        |        |       |        |       |      |       |
| TR01-C | breccia           |              |      | 9.658 | 18.584 | 36.0 | 0.130 | 0.4    |        |       |        |       |      |       |
| Gla 21 | Ferruginous       | Gamohaam Fm. | 2505 |       |        |      |       | 7.598  | 4.896  | 4.25  | 5.080  | -5.08 | -0.3 | -8.1  |

|        |                                                    |                     |      |       |        |      |       |      |        |        |       |       |       |      |       |  |  |  |  |
|--------|----------------------------------------------------|---------------------|------|-------|--------|------|-------|------|--------|--------|-------|-------|-------|------|-------|--|--|--|--|
|        | limestone,<br>recrystallized,<br>laminated         |                     |      |       |        |      |       |      |        |        |       |       |       |      |       |  |  |  |  |
| DF23-C | massive<br>dolomite                                | Malmani<br>Subgroup | 2525 | 6.412 | 10.453 |      | 1.042 |      |        |        |       |       |       |      |       |  |  |  |  |
|        | massive<br>dolomite with<br>minor chert<br>layers  | Malmani<br>Subgroup | 2550 |       |        |      |       |      |        |        |       |       |       |      |       |  |  |  |  |
| DF27-C |                                                    |                     |      | 9.057 | 14.427 | 26.4 | 1.653 | -1.2 |        |        |       |       |       |      |       |  |  |  |  |
|        | laminated<br>dolomite<br>interbedded<br>with chert | Malmani<br>Subgroup | 2560 |       |        |      |       |      |        |        |       |       |       |      |       |  |  |  |  |
| DF26-C |                                                    |                     |      | 8.445 | 10.914 | 18.8 | 2.839 | -2.0 |        |        |       |       |       |      |       |  |  |  |  |
| Nau 6  | Ferruginous<br>dolomite,<br>stromatolitic          | Nauga Fm.           | 2570 |       |        |      |       |      | 8.979  | 3.274  | -0.36 | 7.295 | -6.59 |      |       |  |  |  |  |
| Bav4   | stromatolitic<br>limestone                         | Reivilo Fm.         | 2580 |       |        |      |       |      | 15.325 | 11.199 | 11.89 | 9.573 | -9.49 | -0.5 | -10.4 |  |  |  |  |
| Mon 6  | Cross bedded<br>limestone                          | Monteville Fm.      | 2600 |       |        |      |       |      | 9.706  | 14.800 | 25.56 | 2.111 | -2.75 | -0.5 | -9.8  |  |  |  |  |
| Boo 1  | Oolitic dolomite                                   | Boomplaas Fm.       | 2615 |       |        |      |       |      | 2.467  | 1.013  | 0.60  | 1.945 | -1.33 | 0.3  | -11.3 |  |  |  |  |

2 \*sample visibly altered
